# Supplementary material
Source: PubMed Central journal article supplement (PMC8678383)
Supplement: NIHMS1705886-supplement-Supplementary_Information.pdf [file NIHMS1705886-supplement-Supplementary_Information.pdf]

### A Temporal distribution of fMRI sessions

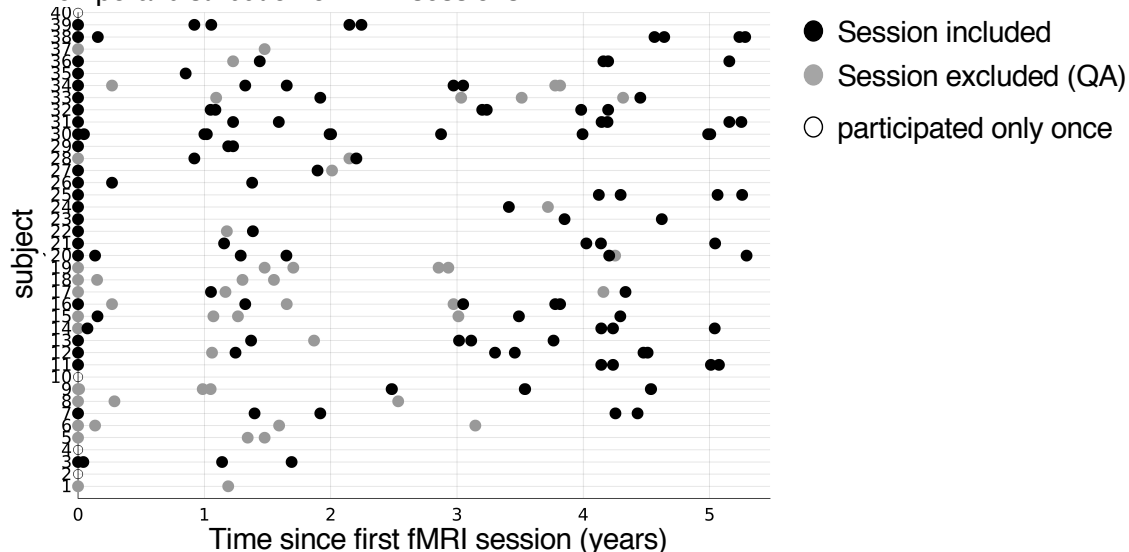

### B Number and quality of sessions in children with $\geq 2$ sessions

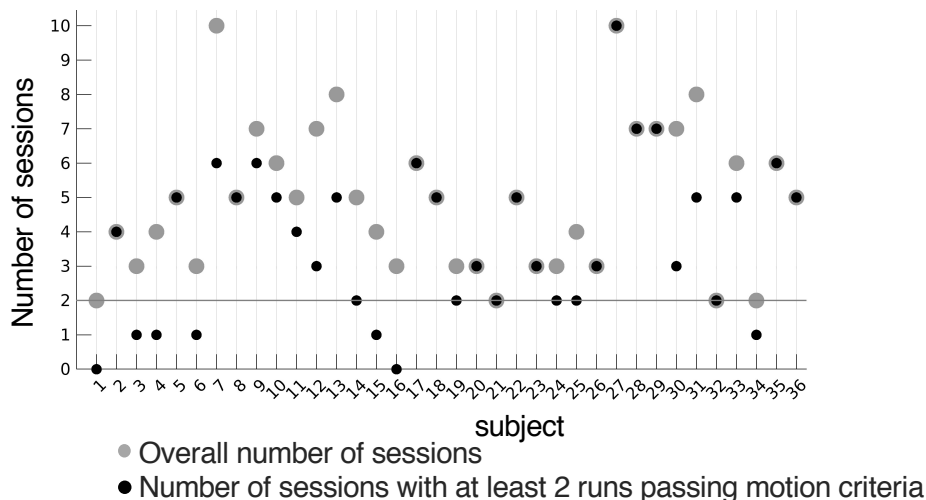

### C Time between first & last scan (included sessions)

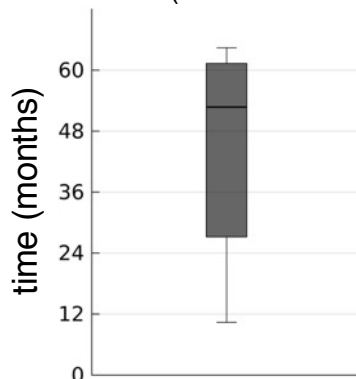

### D Sample stimuli

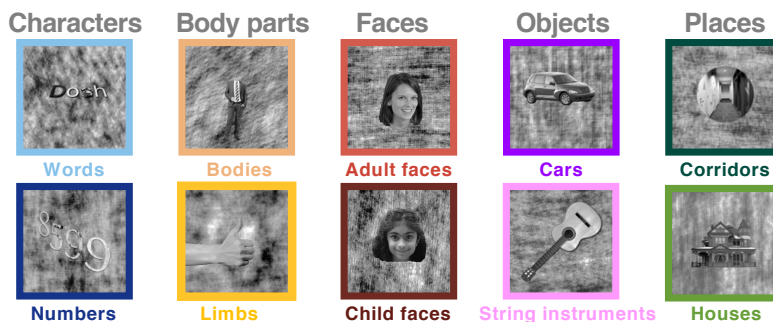

### Supplementary Figure 1. Inclusion and temporal distribution of fMRI sessions and stimuli

(A) The temporal distribution of fMRI sessions is plotted relative to each subject's first session. *Filled black dots*: included sessions. *Filled gray dots*: sessions that were excluded due to quality assurance (QA). *Black outlined dots*: sessions of children who participated only once. (B) Overview of data from children who participated more than once. *Gray dots*: number of total sessions per child. Not included are 2 sessions which were excluded due to technical error. *Black dots*: number of sessions passing motion criteria. *Horizontal black line*: cut-off for inclusion in the present study ( $\geq 2$  sessions passing motion criteria). (C) The boxplot displays the time between the first and last included fMRI session in all included subjects ( $n=29$ ). Boxplot shows the 75% and 25% percentiles (gray area) and the median (horizontal line). Whiskers extend to the most extreme data points not considered outliers (minimum and maximum). (D) Sample stimuli for the 10 categories which can be grouped into five domains. Each domain consists of two categories: characters (words, numbers), body parts (headless bodies, limbs), faces (adult faces, child faces), objects (cars, string instruments), and places (corridors, houses).

# A Lateral VTC

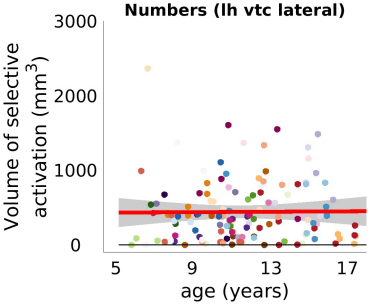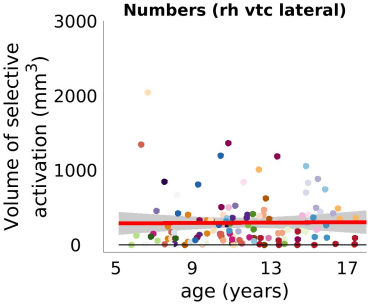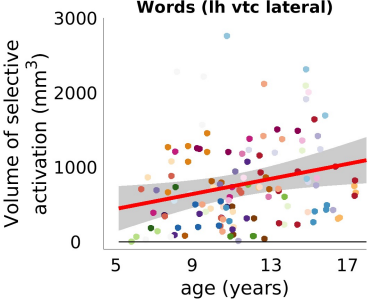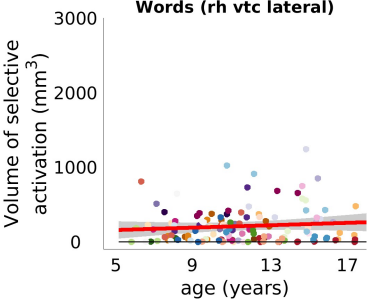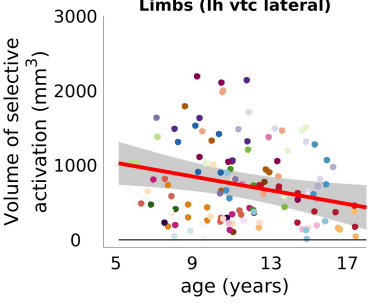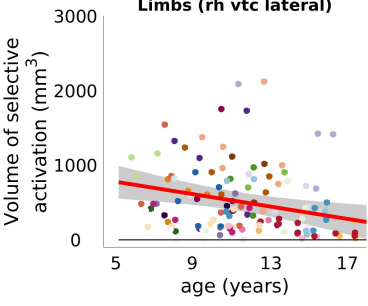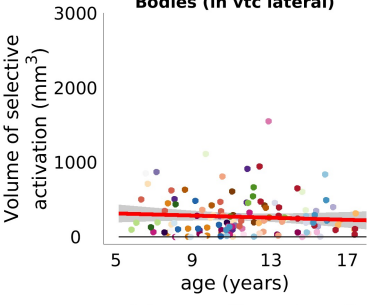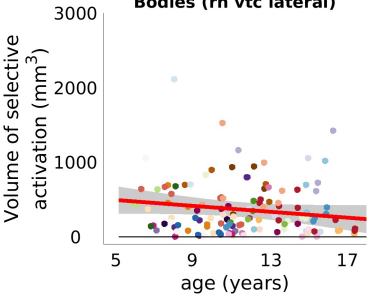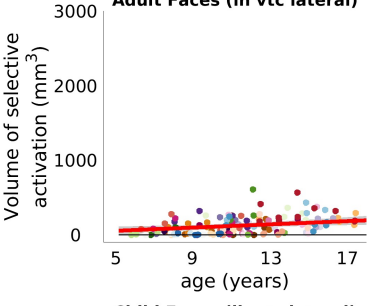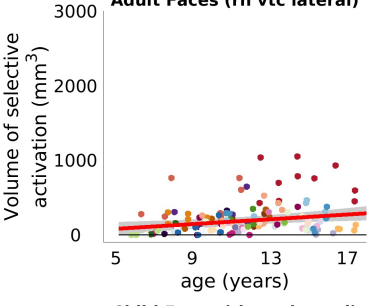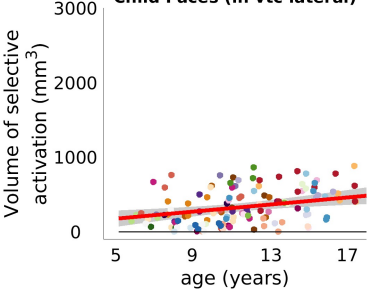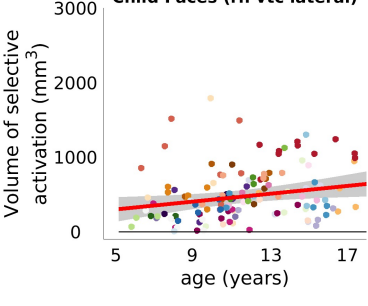

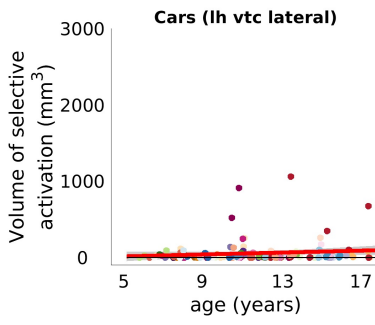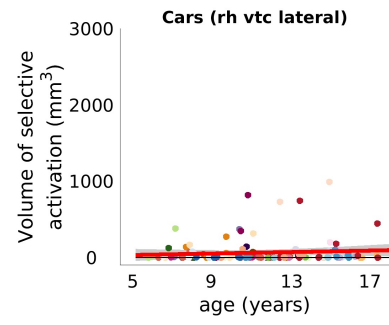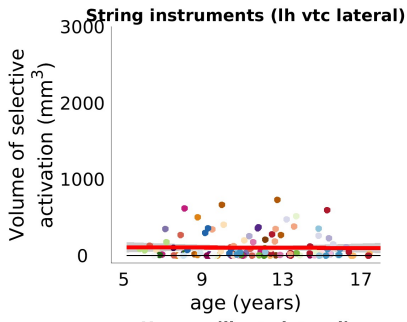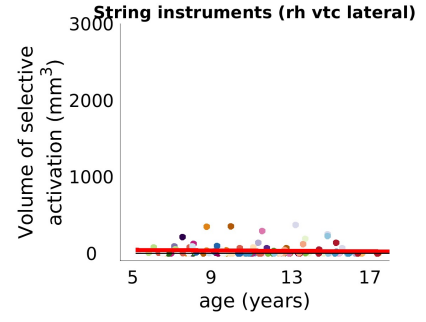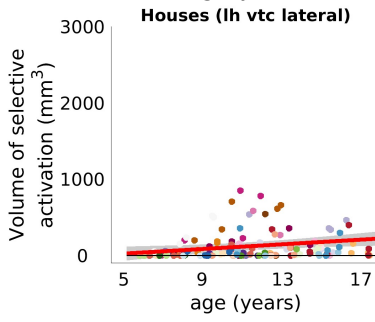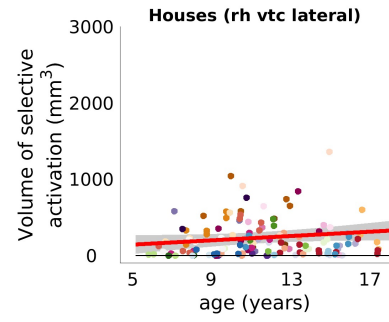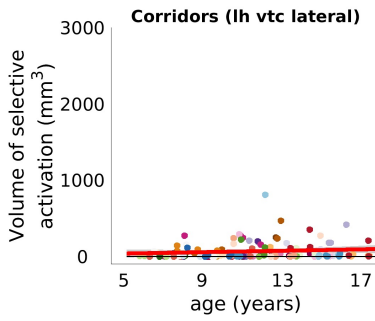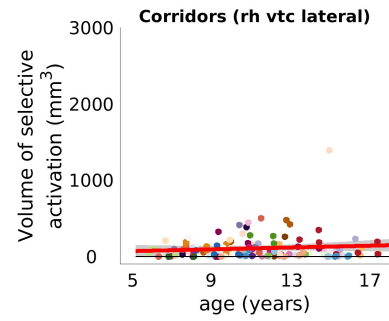

# B Medial VTC

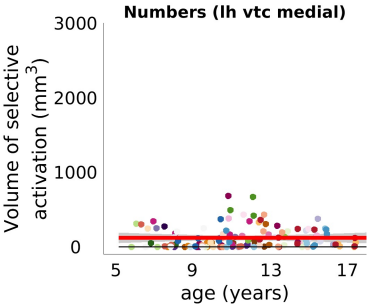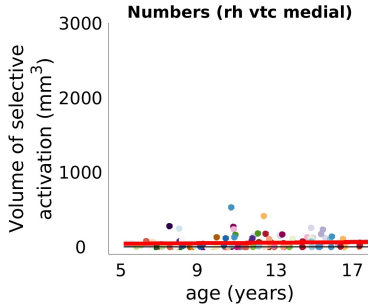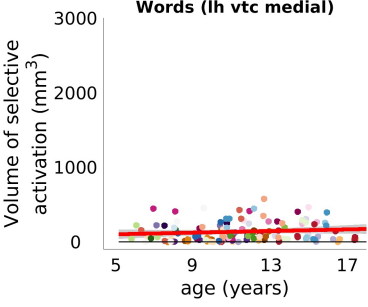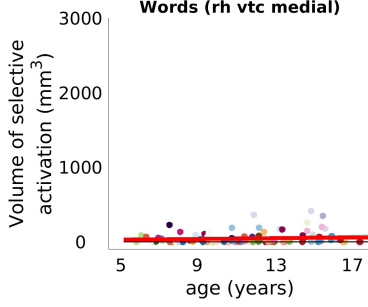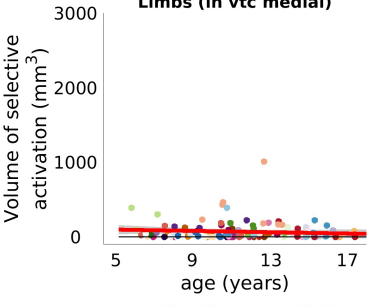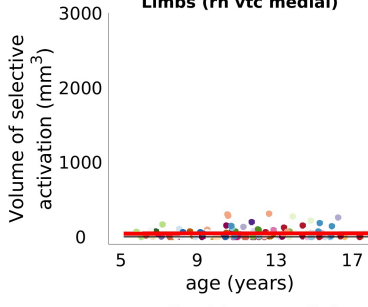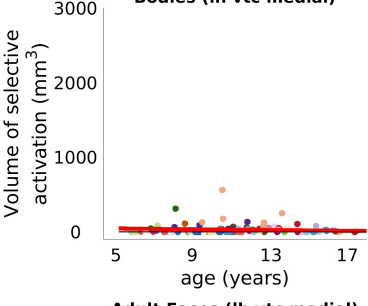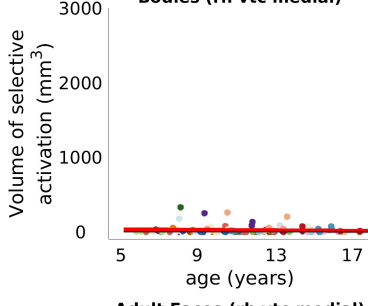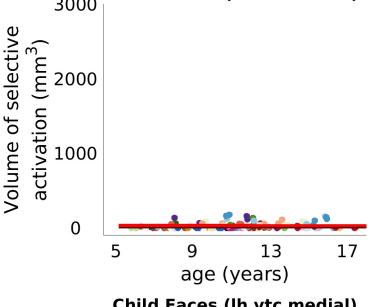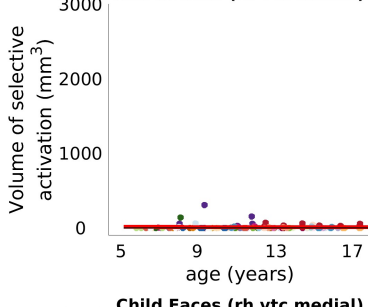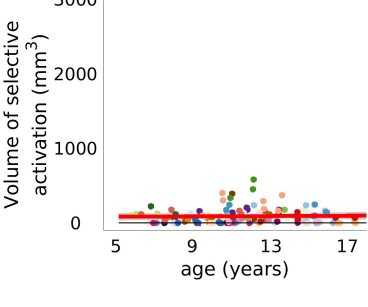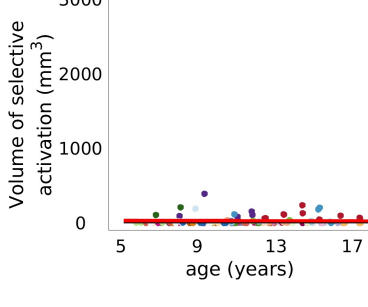



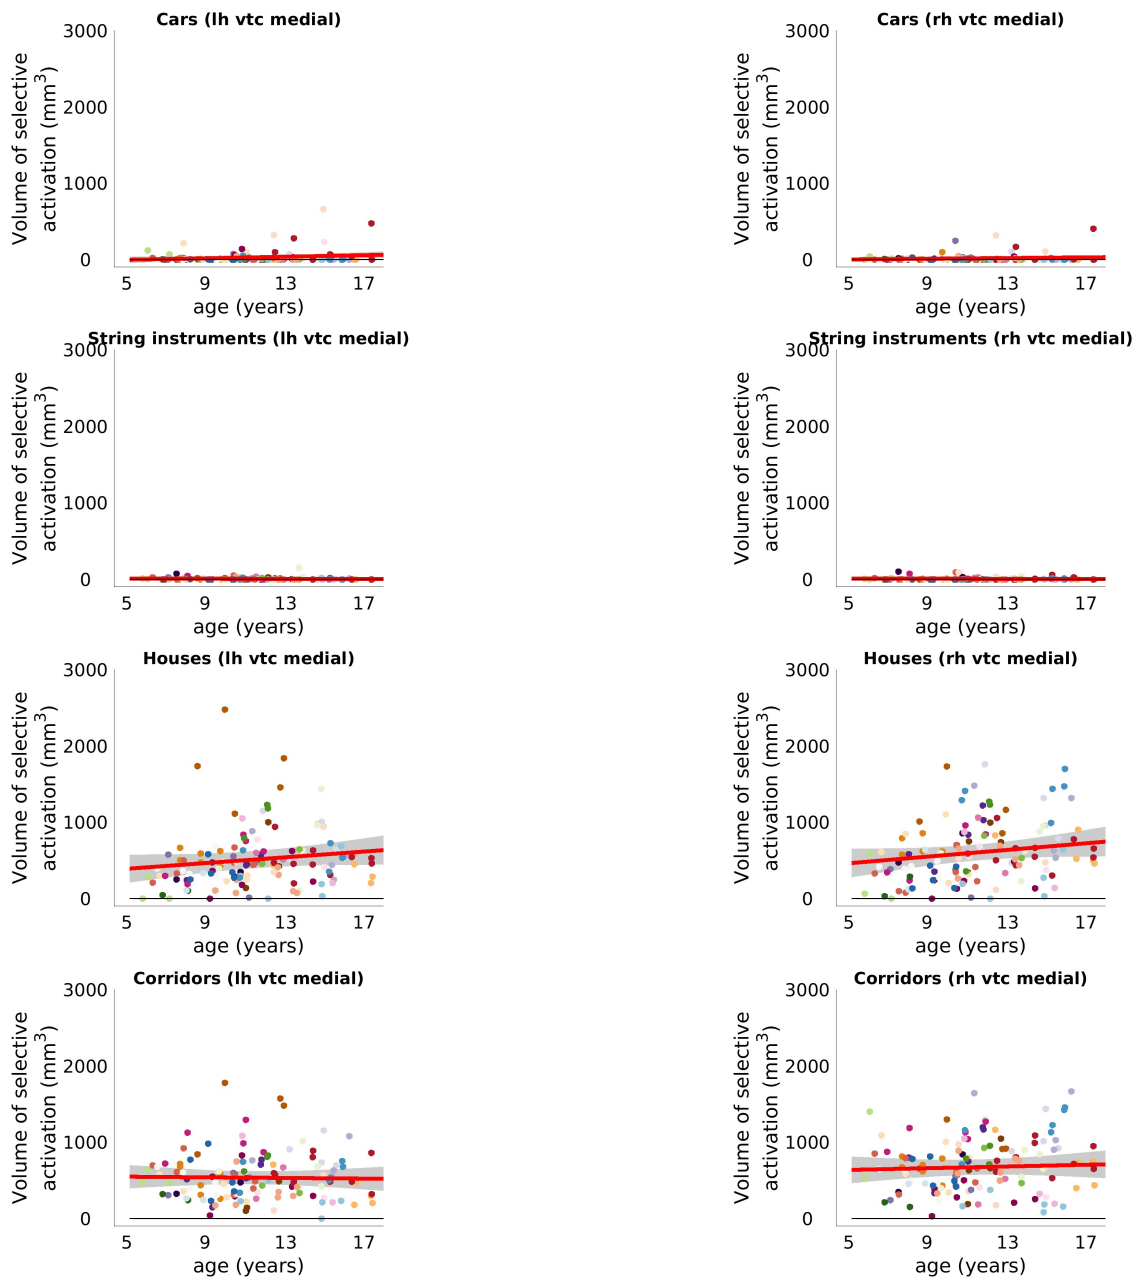

**Supplementary Figure 2. Scatter plots and linear mix model fits (LMM) of the development of the volume of selective activation for each category in lateral and medial VTC.** Each dot represents one session. Each participant is coded with a different color. The red line indicates the LMM predicting volume of selective activation by age ( $n=128$  sessions, 29 children). The gray shaded area represents the 95% CI. **(A)** Lateral VTC. Categories showing significant development are: words (left), limbs (bilateral), adult faces (bilateral), child faces (bilateral) and houses (left). Statistics are reported in Supplementary Table 1. As examination of activations in individual subjects did not reveal consistent clusters of activation for houses in left lateral VTC in contrast to those for faces, limbs, or words – no house ROI was included in follow-up analyses. **(B)** Medial VTC. There were no significant effects in medial VTC. Statistics are reported in Supplementary Table 2. Related to Fig. 1.

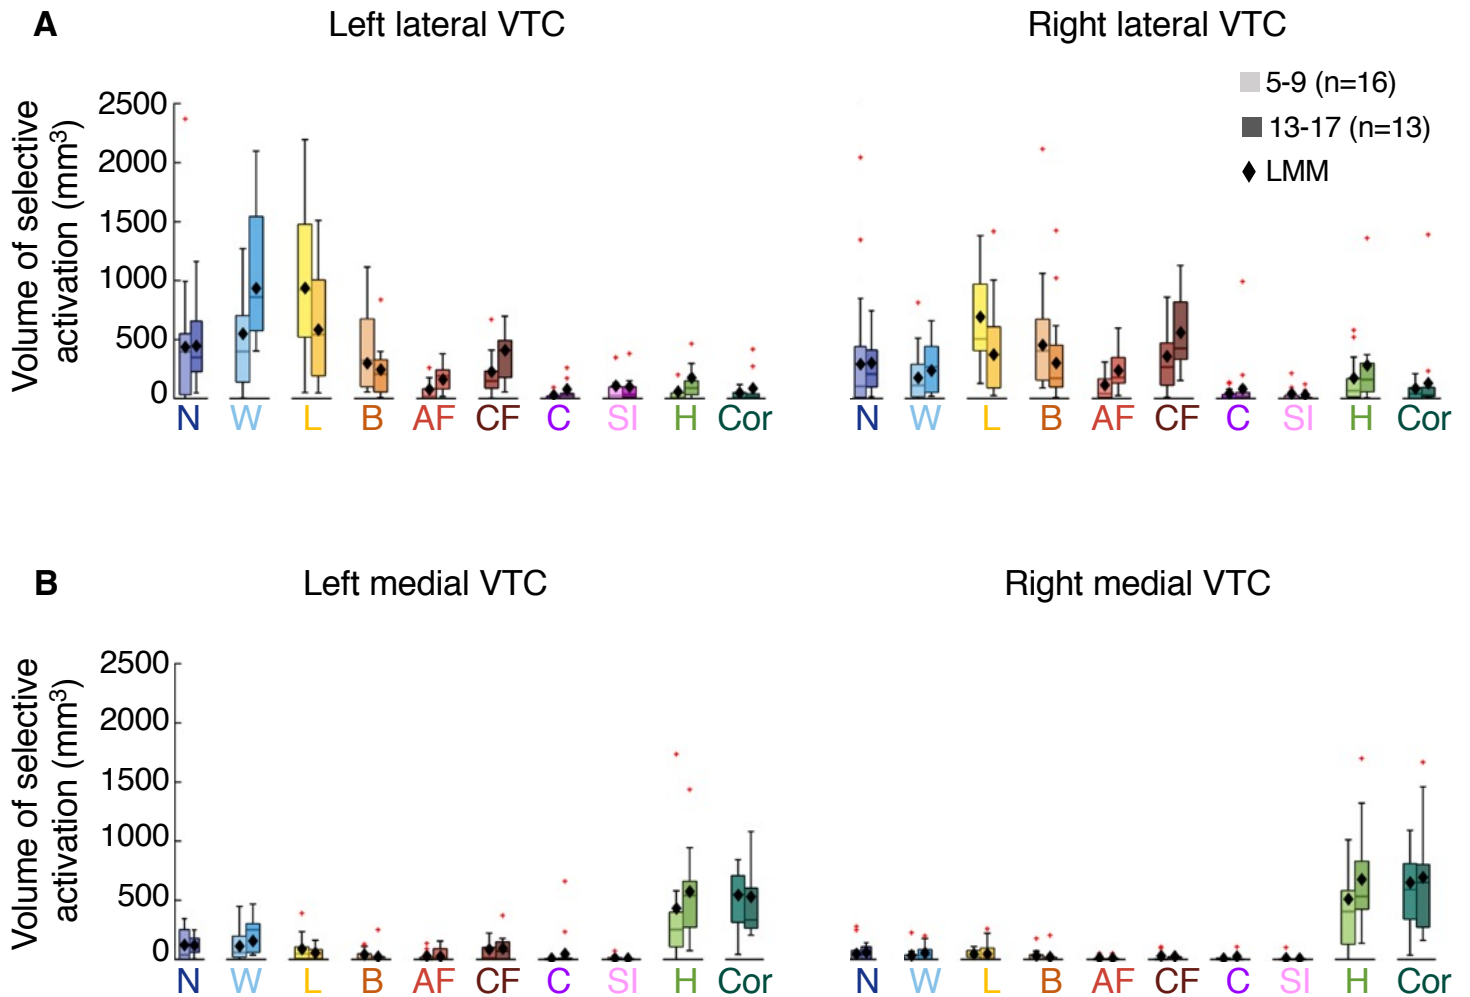

**Supplementary Figure 3. Changes in category-selective activation in lateral and medial VTC.**

(A) Boxplots showing the volume of selective activation for all 10 categories for 5-9-year-olds (n=16) and 13-17-year-olds (n=13) in left and right lateral VTC. One functional session per child is included per boxplot. Boxplots show the 75% and 25% percentiles (colored areas) and the median (horizontal lines). Whiskers extend to the most extreme data points not considered outliers (minimum and maximum). *Crosses*: outliers (values more than 1.5 times the interquartile range away from the bottom or top of the box). *Black diamonds*: LMM prediction for the mean age of each age group (based on n=128 sessions, 29 children). (B) Same as (A) but for medial VTC. N = numbers; W = words; L = limbs; B = bodies; AF = adult faces; CF = child faces; C = cars; SI = string instruments; H = houses; Cor = corridors. Related to Fig 1D.

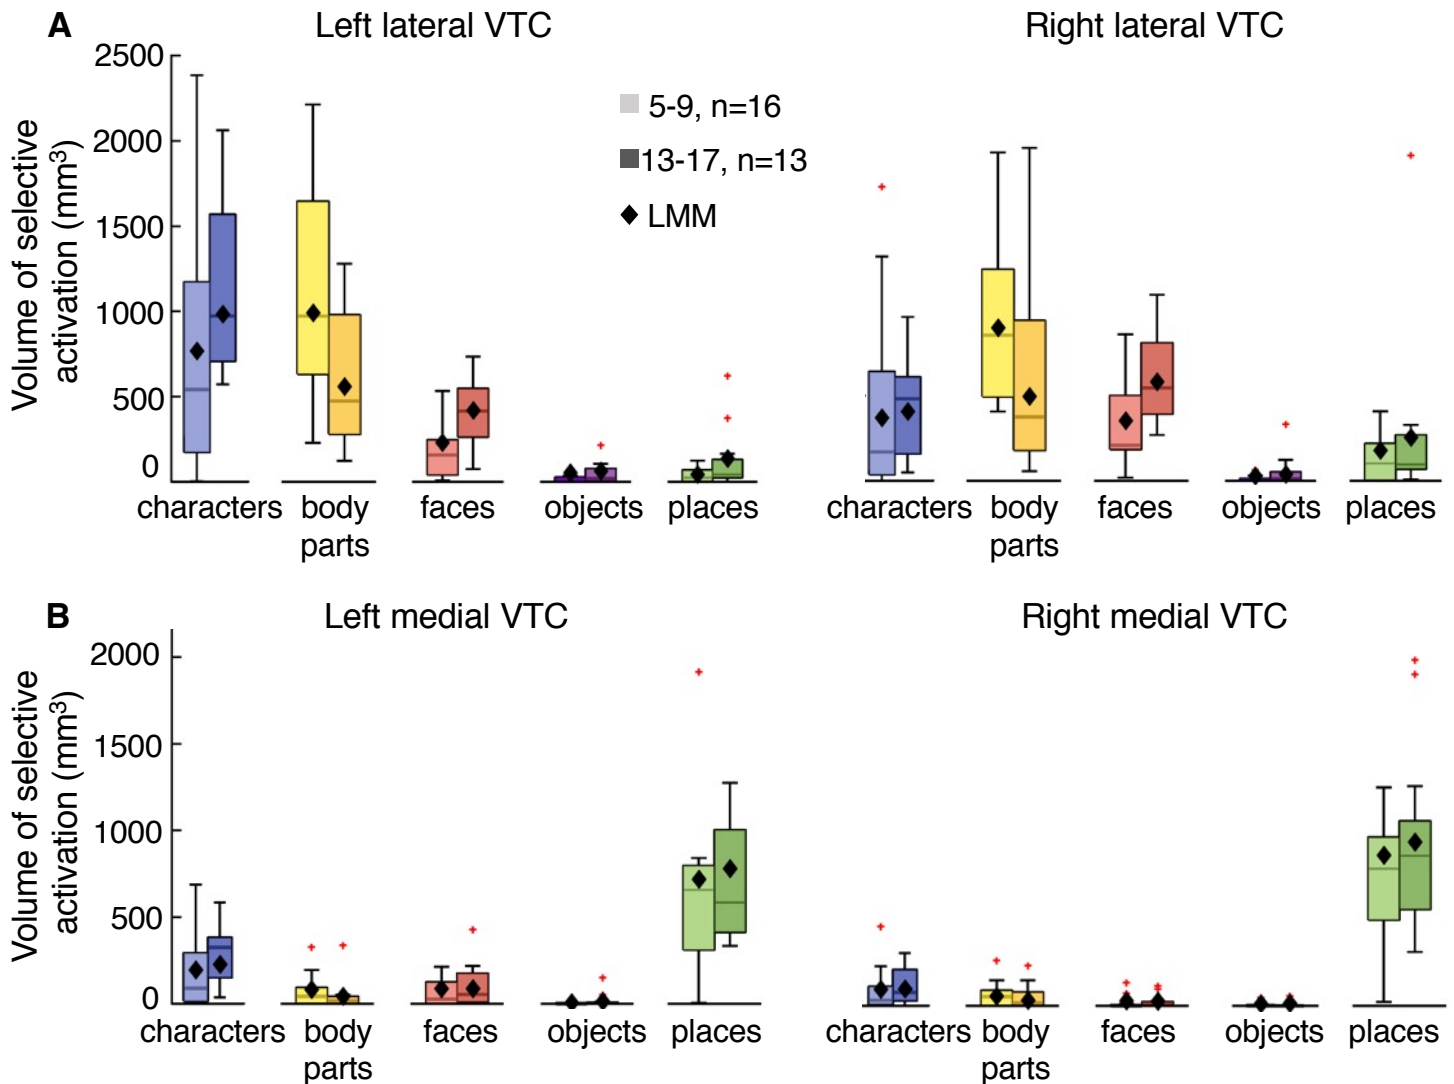

**Supplementary Figure 4. Changes in the volume of domain-selective activation in lateral and medial VTC.**

**(A)** Boxplots showing volume of selective activation for each of the five domains in the left and right lateral VTC of 5-9-year-old ( $n=16$ ) and 13-17-year-old ( $n=13$ ) children. One functional session per child is included per boxplot. Lighter colors indicate younger ages. Boxplots show the 75% and 25% percentiles (colored areas) and the median (horizontal lines). Whiskers extend to the most extreme data points not considered outliers (minimum and maximum). *Crosses*: outliers (values more than 1.5 times the interquartile range away from the bottom or top of the box). *Black diamonds*: LMM prediction for the mean age of each age group (based on  $n=128$  sessions, 29 children). For domain contrasts, each domain is contrasted with all other domains (selectivity:  $t$ -value  $> 3$ , voxel-level). LMMs ( $n=128$  sessions) reveal significant bilateral development of body parts and face-selective activations. Specifically, the volume of body part-selective activation decreased in the left (slope= $-4.63$  (CI: $-7.6,-1.7$ ) [ $\text{mm}^3/\text{month}$ ],  $t(126)=-3.10$ ,  $p=0.016$ , FDR-corrected) and right hemisphere (slope= $-4.31$  (CI: $-6.9,-1.7$ ) [ $\text{mm}^3/\text{month}$ ],  $t(126)=-3.27$ ,  $p=0.014$ , FDR-corrected), as volume of face-selective activation increased bilaterally (left: slope= $2.03$  (CI:  $0.87,3.18$ ) [ $\text{mm}^3/\text{month}$ ],  $t(126)=3.48$ ,  $p=0.014$ ; right= $2.45$  (CI:  $0.81,4.10$ ) [ $\text{mm}^3/\text{month}$ ],  $t(126)=2.95$ ,  $p=0.019$ , FDR-corrected). No other domain showed significant development, but there was a trend for increase in volume of place-selective activation in the left hemisphere (slope= $1.00$  (CI:  $0.21,1.78$ ) [ $\text{mm}^3/\text{month}$ ],  $t(126)=2.52$ ,  $p=0.053$ , FDR-corrected). **(B)** Same as (A) but for medial VTC. No domain showed significant development in medial VTC. Related to Fig 1.

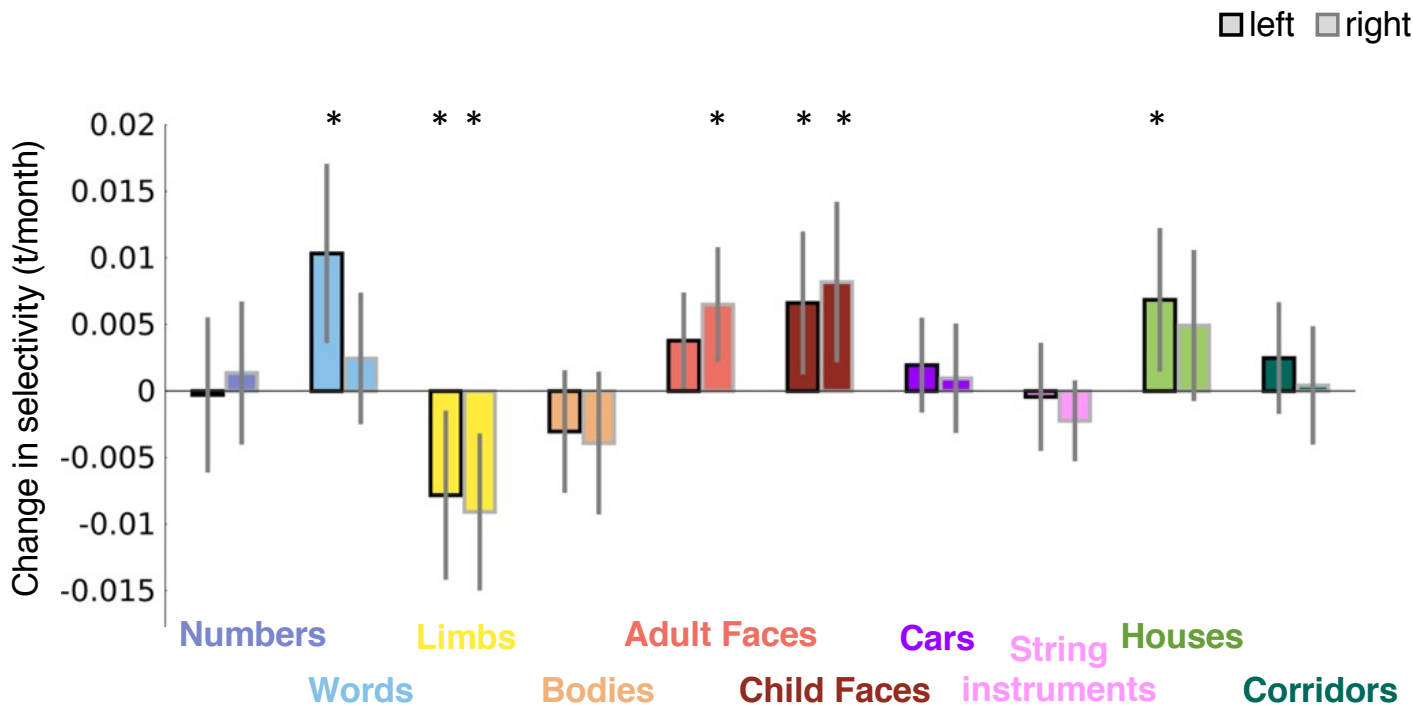

**Supplementary Figure 5. Development of selectivity in the 20% most selective voxels of lateral VTC.**

Bars depict the slopes of LMMs, that is, the change in selectivity (t-value/month) in the 20% most selective voxels for each category contrast in left and right lateral VTC (n=128 sessions, 29 children). Note that the number of included voxels (corresponding to the 20% most selective) per participant does not change across sessions, as all functional sessions of the same participant are aligned to the same brain anatomy (individual subject template). This analysis reveals significant developmental increases in selectivity for words in the left lateral VTC (left: slope= 0.010 (CI:0.004,0.017) (t/month),  $t(126)=3.04$ ,  $p_{FDR}=0.023$ ), a significant decrease for limbs in both hemispheres (left: slope=-0.008 (CI:-0.014,-0.002) (t/month),  $t(126)=-2.44$ ,  $p_{FDR}=0.047$ ; right=-0.009 (CI:-0.015,-0.003) (t/month),  $t(126)=-3.05$ ,  $p_{FDR}=0.023$ ), significant increases for adult faces in the right hemisphere (right: slope=0.007 (CI:0.002,0.011) (t/month),  $t(126)=2.98$ ,  $p_{FDR}=0.023$ ), child faces in both hemispheres (left: slope=0.007 (CI:0.0012,0.012) (t/month),  $t(126)=2.43$ ,  $p_{FDR}=0.047$ ; right: slope=0.008 (CI:0.002,0.014) (t/month),  $t(126)=2.68$ ,  $p_{FDR}=0.041$ ), and houses in the left lateral VTC (left: slope=0.007 (CI:0.0014,0.012) (t/month),  $t(126)=2.51$ ,  $p_{FDR}=0.047$ ). Error bars: 95% CI of the slope. If the CI does not cross the y=0 line, this indicates that the slope is significantly different than 0 before FDR-correction. Asterisks: effects surviving FDR correction ( $p_{FDR}<0.05$ ). Related to Fig. 1C.

## A Left Lateral VTC

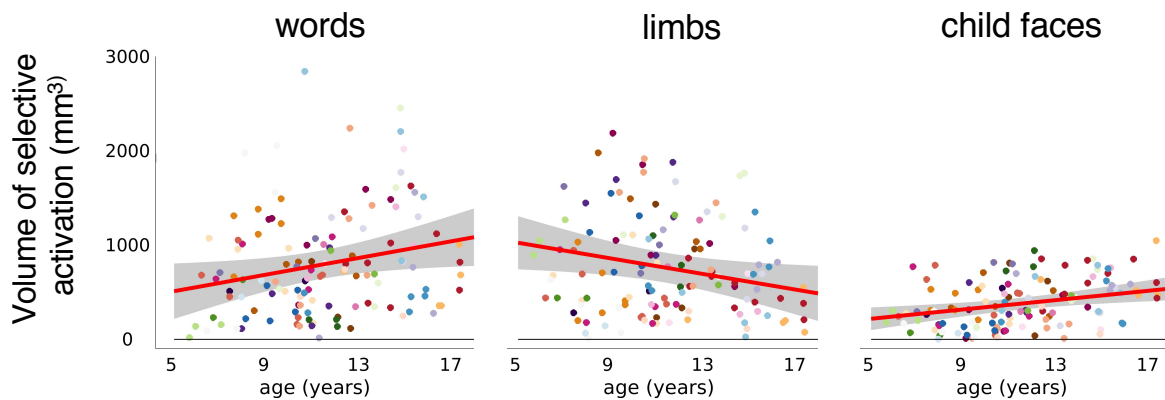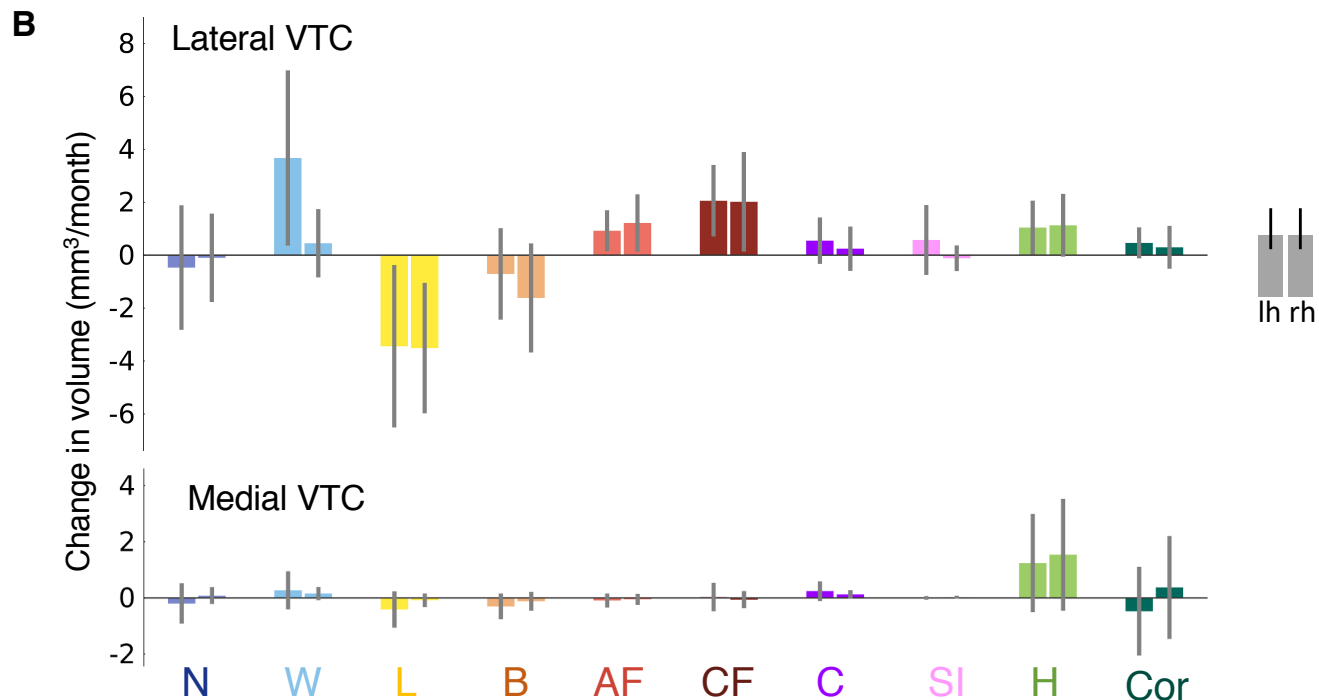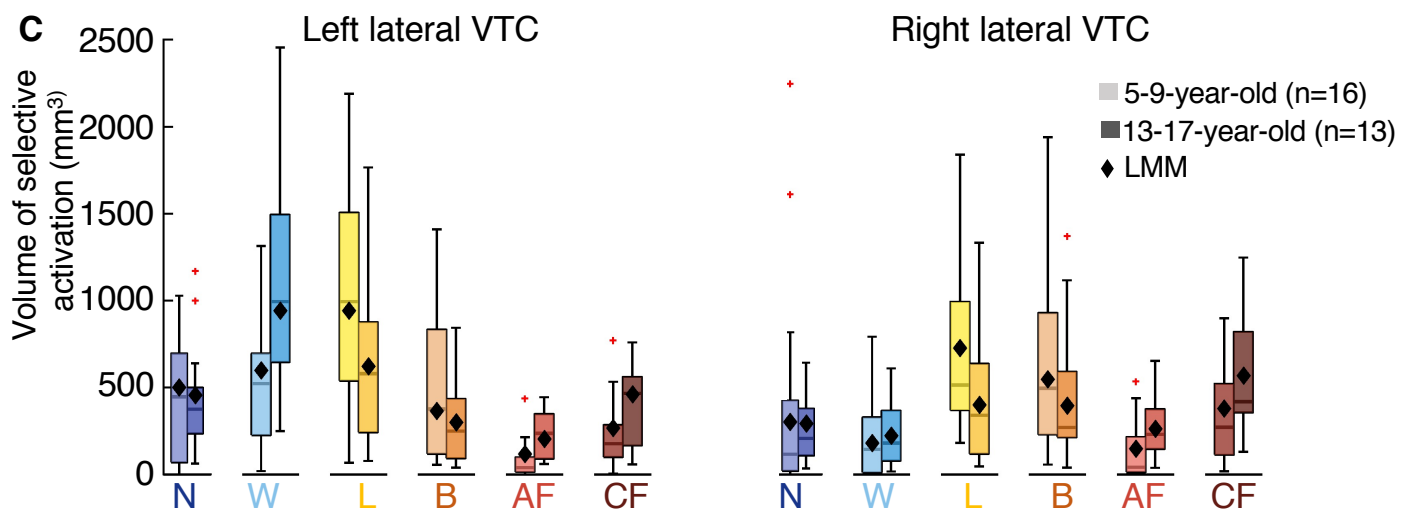

**Supplementary Figure 6. Developmental increases and decreases in category-selective activation in lateral VTC when using contrasts that exclude words, adult faces, child faces and limbs as control categories.** (A) Volume of word-, limb- and child-face-selective activation by age. Each dot is a session and is colored by participant. *Red line*: Linear mixed model (LMM) prediction of category-selective activation by age. *Shaded gray*: 95% confidence interval (CI). (B) LMM slopes indicating change in category-selective activation ( $n=128$  sessions, 29 children) volume per month ( $n=128$  sessions, 29 children). Error bars: 95% CI. If the CI does not cross the  $y=0$  line, this indicates that the slope is significantly different than 0 before FDR-correction. (C) Category-selective activation by age group. One session per child is included per boxplot. Boxplots show the 75% and 25% percentiles (colored areas) and the median (horizontal lines). Whiskers extend to the most extreme data points not considered outliers (minimum and maximum). *Crosses*: outliers (values more than 1.5 times the interquartile range away from the bottom or top of the box); *Diamonds*: mean volume predicted by LMM. Related to Fig. 1.

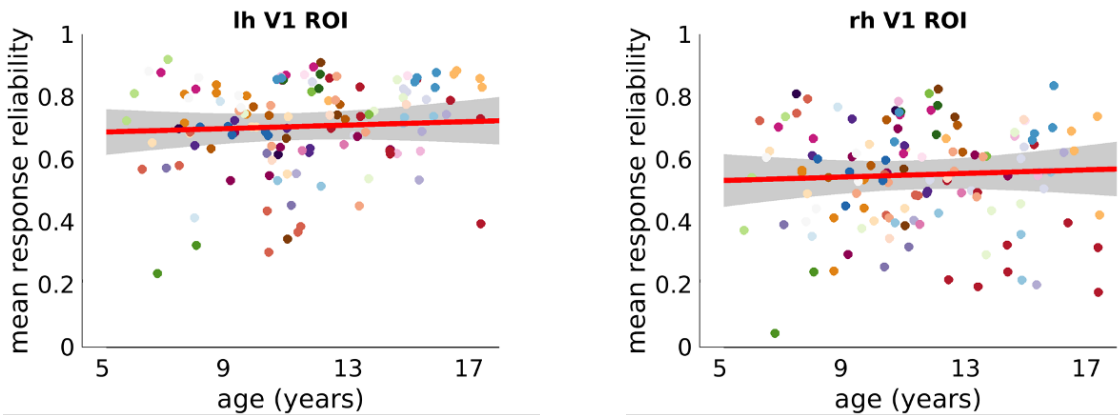

**Supplementary Figure 7. Response reliability in V1 does not significantly vary with age.**

We measured the reliability of distributed responses for items of the same category across two runs in each session. We then calculated the mean response reliability across all 10 categories. I.e., this is the mean of the on-diagonal of the representational similarity matrix for the 10 categories based on multivoxel patterns for the two runs included in each session. Each dot is a session and dots are colored by participant. Scatter plots show the response reliability in V1 as a function of age. *Red line*: Linear mixed model (LMM) prediction of response reliability by age using a random intercept model with the grouping variable subject (response reliability  $\sim$  age + (1|subject)). *Shaded gray*: 95% confidence interval (CI). Analyses (n=128 sessions, 29 children) reveal no statistically significant effect of age on response reliability in V1 (left:  $\beta_{\text{age}} = 0.0002$  (CI: -0.0005, 0.001),  $t(126) = 0.59$ ,  $p = 0.56$ ; right:  $\beta_{\text{age}} = 0.0002$  (CI: -0.0007, 0.001),  $t(126) = 0.51$ ,  $p = 0.61$ ).

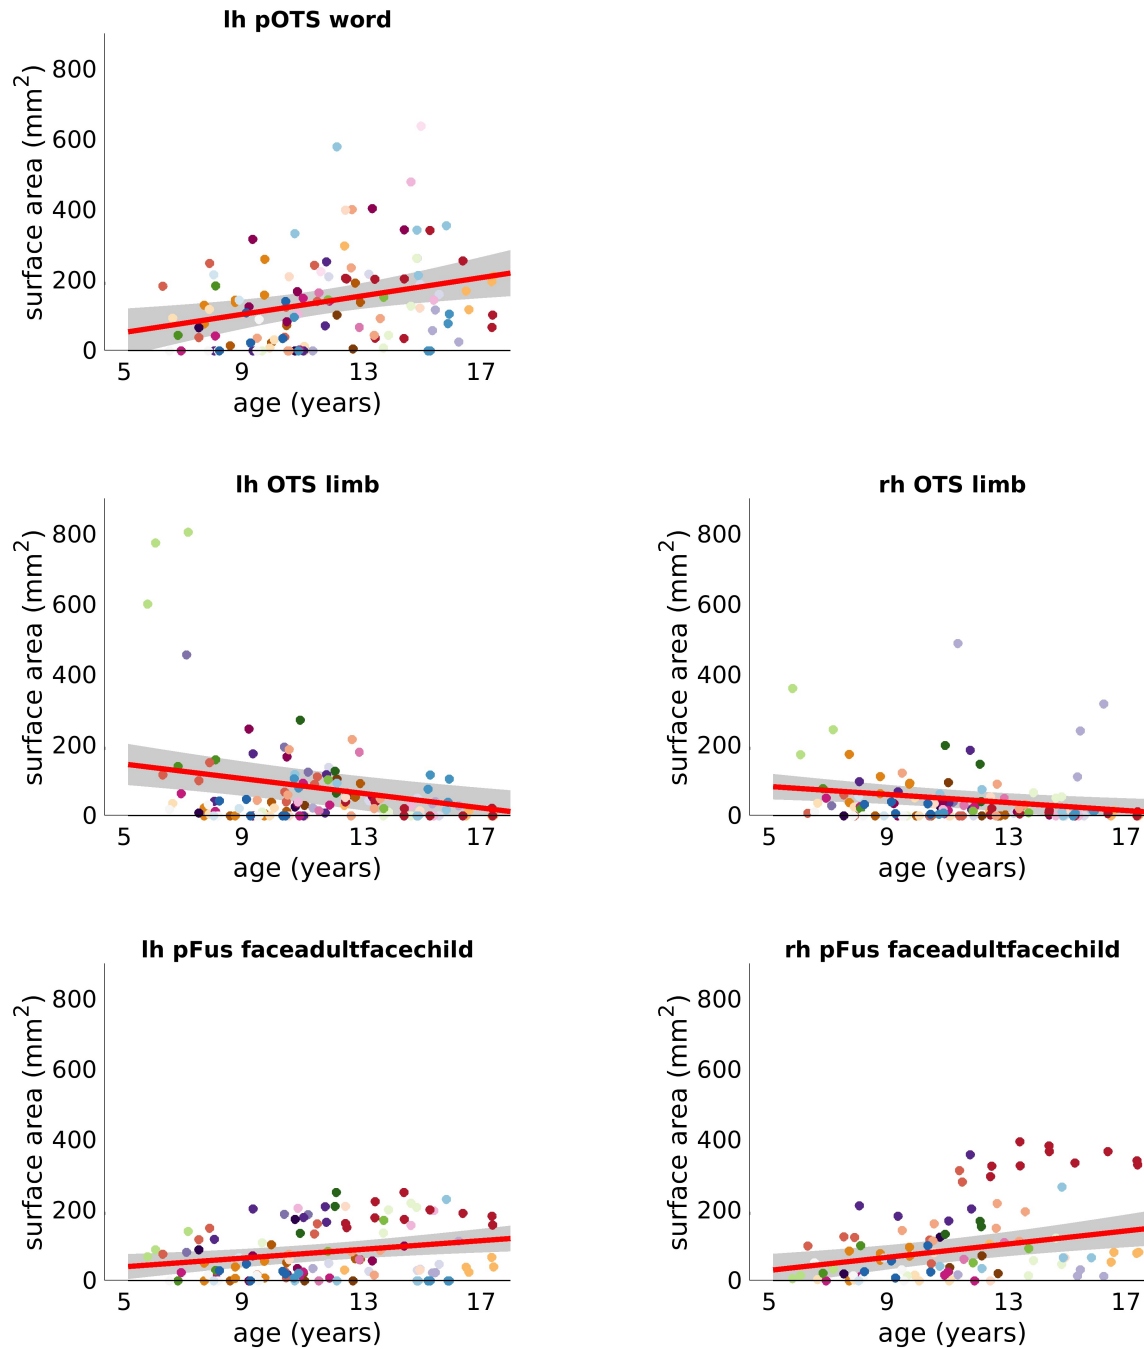

### Supplementary Figure 8. Differential development of ROI surface area.

Surface area of word-, limb- and face-selective regions by age. Each dot is a session and dots are colored by participant. *Red line*: LMM prediction of surface area of ROIs by age. Shaded *gray*: 95% confidence interval (CI). This analysis replicates the results presented in Fig. 2. We find a significant increase in the surface area of left pOTS-words ( $\beta_{\text{age}}=1.07$  (CI:0.35,1.79),  $t(117)=2.94$ ,  $p=0.004$ ,  $n=119$  sessions,  $n=26$  children) and left and right pFus-faces (left:  $\beta_{\text{age}}=0.51$  (CI:0.17,0.85),  $t(118)=2.94$ ,  $p=0.004$ ,  $n=120$  sessions,  $n=27$  children; right:  $\beta_{\text{age}}=0.77$  (CI:0.32,1.22),  $t(96)=3.38$ ,  $p=0.001$ ,  $n=98$  sessions,  $n=22$  children), as well as a significant decrease in surface area of left and right OTS-limbs (left:  $\beta_{\text{age}}=-0.86$  (CI:-1.32,-0.39),  $t(124)=-3.65$ ,  $p=0.0004$ ,  $n=126$  sessions,  $n=28$  children; right:  $\beta_{\text{age}}=-0.47$  (CI:-0.81, -0.13),  $t(124)=-2.72$ ,  $p=0.0075$ ,  $n=126$  sessions,  $n=28$  children).

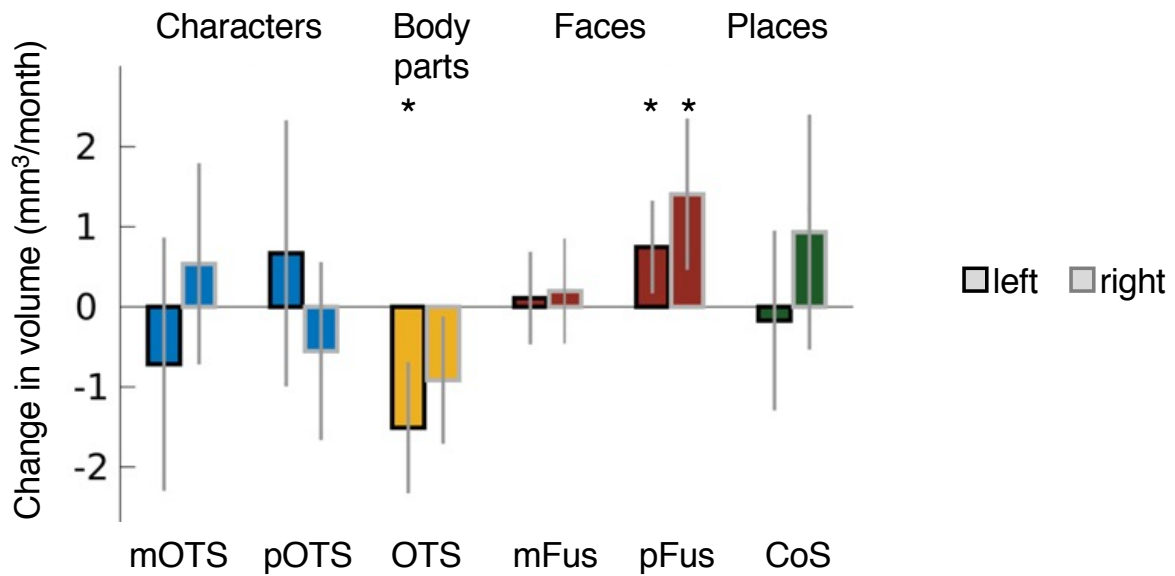

### Supplementary Figure 9. Differential development of domain-selective ROIs.

Slopes of LMMs indicating the change in ROI volume for character-, body part-, and face- and place-selective regions when using domain-contrasts to define ROIs. Results of this analysis extend findings related to Fig. 2.

- (i) Analyses reveal no statistically significant effect of age for the anterior (words + numbers > others, left: slope=-0.71 (CI:-2.3,0.87),  $t(65)=-0.90$ ,  $p_{FDR}=0.57$ ,  $n=67$  sessions,  $n=24$  children, right: slope=0.54 (CI:-0.72,1.79),  $t(33)=0.87$ ,  $p_{FDR}=0.57$ ,  $n=35$  sessions,  $n=13$  children) or posterior character-selective ROI (left: slope=0.67 (CI:-0.99,2.33),  $t(96)=0.80$ ,  $p_{FDR}=0.57$ ,  $n=98$  sessions,  $n=26$  children, right: slope=-0.55 (CI:-1.66,0.56),  $t(68)=-0.99$ ,  $p_{FDR}=0.57$ ,  $n=70$  sessions,  $n=23$  children).
- (ii) There is a significant decrease in the volume of body parts selective activation (limbs + headless bodies > others) in the left hemisphere (slope=-1.51 (CI:-2.33,-0.69) ( $\text{mm}^3/\text{month}$ ),  $t(124)=-3.65$ ,  $p_{FDR}=0.0046$ ,  $n=126$  sessions,  $n=28$  children) and a similar but not significant trend after FDR correction in the right hemisphere (slope=-0.91 (CI:-1.71,-0.12) ( $\text{mm}^3/\text{month}$ ),  $t(123)=-2.27$ ,  $p_{FDR}=0.07$ ,  $n=125$  sessions,  $n=28$  children).
- (iii) While analyses show no statistically significant effect of age on the volume of mFus-faces, the posterior pFus-faces develops significantly in both hemispheres (note that for face-selective regions the same contrast was used in Fig. 2D, see Supplementary Table 8 for statistics).
- (iv) Analyses reveal no statistically significant effect of age on the volume of place-selective CoS-places (left: slope=-0.17 (CI:-1.29,0.95),  $t(126)=-0.3$ ,  $p_{FDR}=0.77$ ,  $n=128$  sessions,  $n=29$  children, right: slope=0.933 (CI: -0.53, 2.40),  $t(126)=1.26$ ,  $p_{FDR}=0.51$ ,  $n=128$  sessions,  $n=29$  children).

*Error bars:* 95% CI of the slope. If the CI does not cross the  $y=0$  line, this indicates that the slope is significantly different than 0 before FDR-correction. *Asterisks:* effects surviving FDR correction ( $p_{FDR}<0.05$ ). Related to Fig. 2.



**A Emerging left pOTS-words**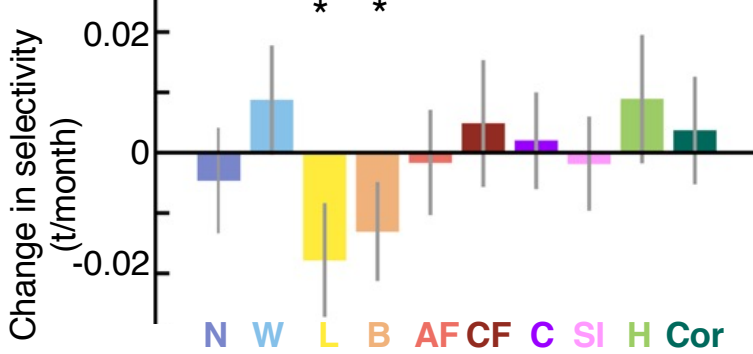**B Waning left OTS-limbs**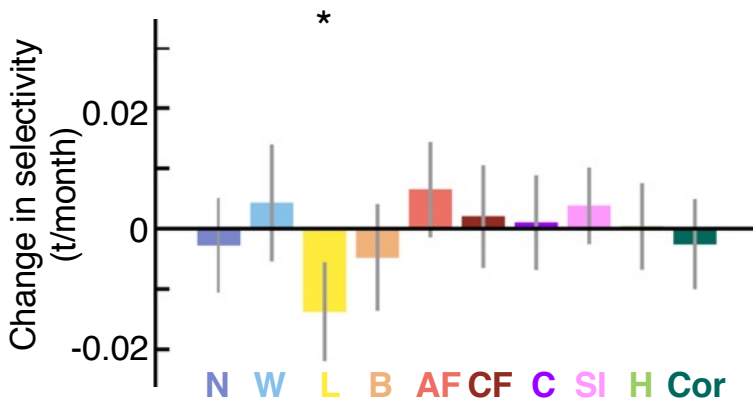**C Waning right OTS-limbs**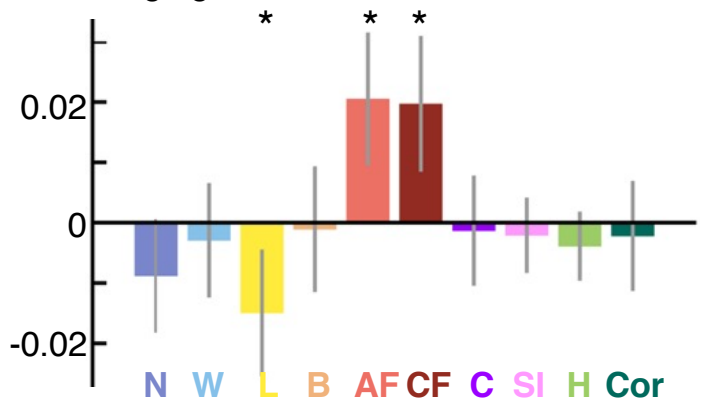**D Emerging left pFus-faces**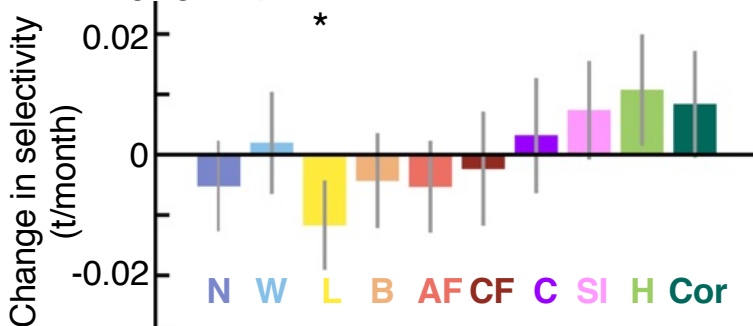**E Emerging right pFus-faces**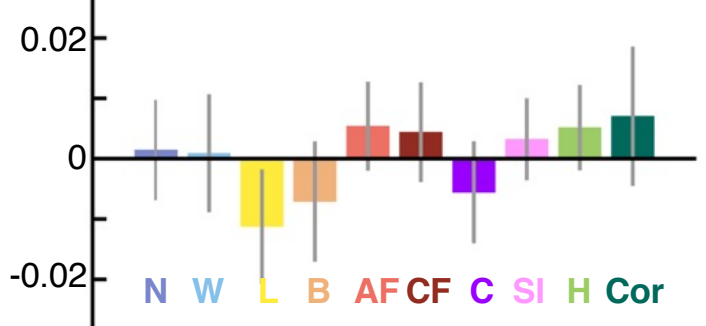**Supplementary Figure 10. Development of selectivity in independent ring-shaped ROIs.**

Bar plots show slopes of LMMs for changes in selectivity by age in independent ring-shaped ROIs. **(A)** In the left pOTS-words-ring ROI there was a significant decrease for both limb- (slope=-0.018 (CI:-0.027,-0.008) [t/month],  $t(95)=-3.75$ ,  $p_{FDR}=0.010$ ,  $n=97$  sessions) and body-selectivity (slope=-0.013 (CI:-0.02,-0.005) [t/month],  $t(95)=-3.16$ ,  $p_{FDR}=0.019$ ,  $n=97$  sessions). **(B)** In the left OTS-limbs-ring ROI limb-selectivity decreased significantly (slope=-0.014 (CI:-0.02,-0.006) [t/month],  $t(118)=-3.32$ ,  $p_{FDR}=0.015$ ,  $n=120$  sessions). **(C)** In the right OTS-limbs-ring ROI limb-selectivity decreased (slope=-0.015 (CI:-0.026,-0.004) [t/month],  $t(87)=-2.83$ ,  $p_{FDR}=0.042$ ,  $n=98$  sessions) while face-selectivity increased (adult faces: slope=0.021 (CI:0.009,0.032) [t/month],  $t(87)=3.68$ ,  $p_{FDR}=0.010$ ; child faces: slope=0.02 (CI:0.008,0.031) [t/month],  $t(87)=3.48$ ,  $p_{FDR}=0.013$ ,  $n=98$  sessions). **(D)** In the left pFus-faces-ring ROI selectivity to limbs decreased significantly (slope=-0.012 (CI:-0.019,-0.004) [t/month],  $t=-3.13$ ,  $p_{FDR}=0.019$ ,  $n=105$  sessions). **(E)** In the right pFus-faces-ring ROI no effect survived FDR-correction. Error bars: 95% CI of the slopes. If the CI does not cross the  $y=0$  line, this indicates that the slope is significantly different than 0 (before FDR-correction). Asterisks: significant after FDR-correction ( $p_{FDR}<0.05$ ). N = numbers; W = words; L = limbs; B = bodies; AF = adult faces; CF = child faces; C = cars; SI = string instruments; H = houses; Cor = corridors. Related to Fig. 3.

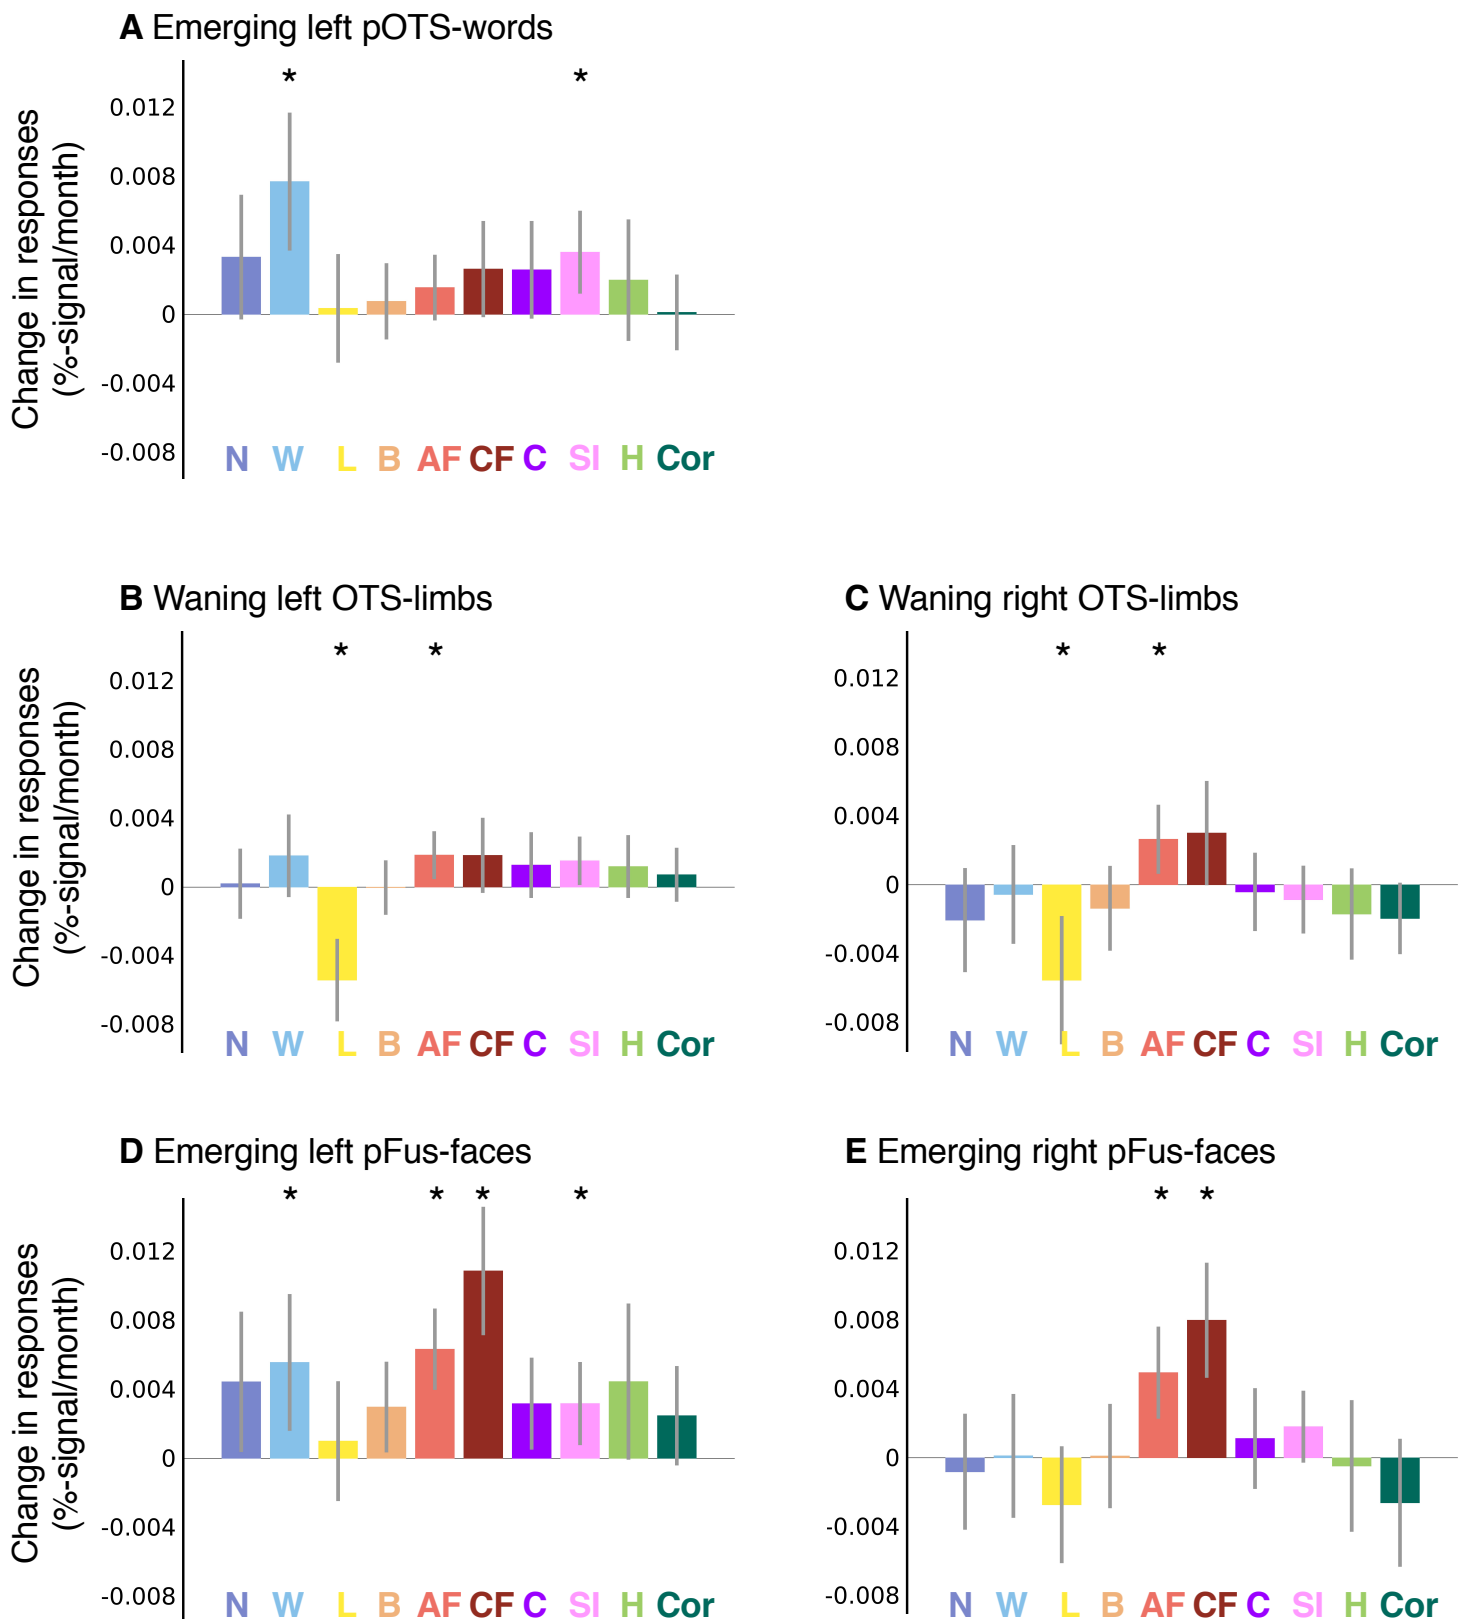

**Supplementary Figure 11. Development of response amplitudes in the waning and emerging parts of category-selective ROIs.**

Bar plots show slopes of LMMs for changes in response amplitude (%-signal) by age. *Error bars*: 95% CI of the slopes. If the CI does not cross the  $y=0$  line, this indicates that the slope is significantly different than 0 before FDR-correction. *Asterisks*: significant after FDR-correction ( $p_{FDR}<0.05$ ). All statistics are reported in Supplementary Table 11. N = numbers; W = words; L = limbs; B = bodies; AF = adult faces; CF = child faces; C = cars; SI = string instruments; H = houses; Cor = corridors. Related to Fig. 3.

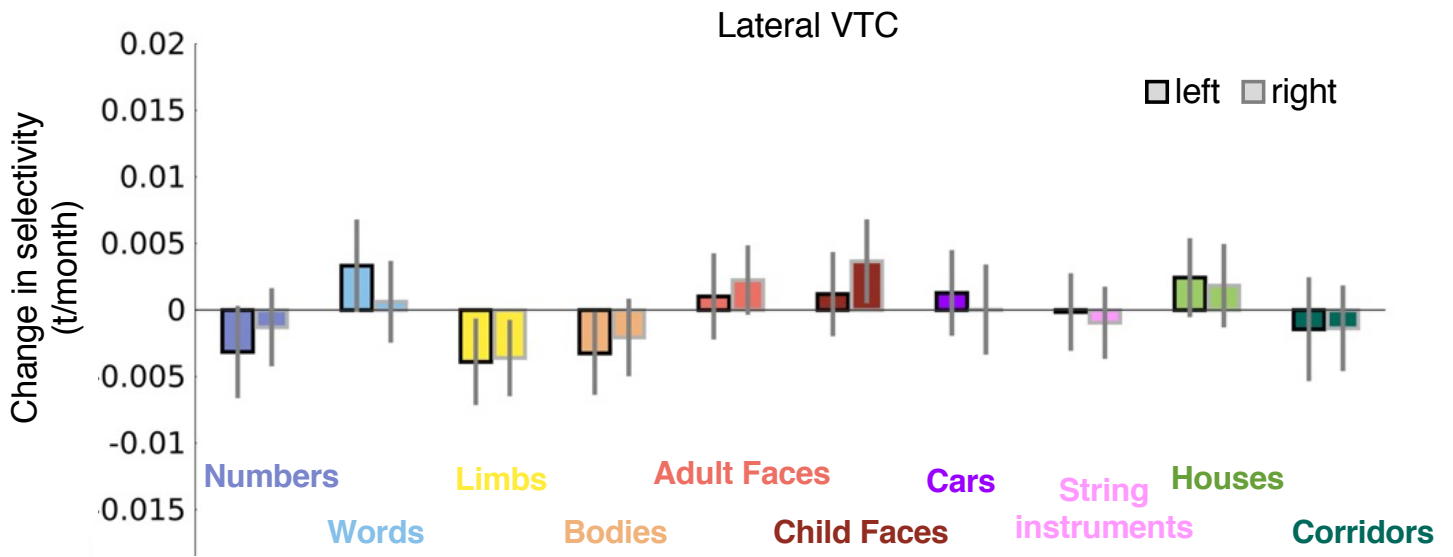

**Supplementary Figure 12. No significant development of limb-selectivity in the remaining lateral VTC after excluding the voxels that were selective to categories showing significant development.** Slopes of LMMs (n=128 sessions) indicating the change in selectivity (t/month) in the remainder of lateral VTC voxels after excluding the voxels that were selective in the first session to the categories showing development (adult faces, child faces, limbs, words, houses). If the CI does not cross the  $y=0$  line, this indicates that the slope is significantly different than 0 before FDR-correction. No effects survive FDR-correction. *Error bars: 95% CI of the slope.* Related to Fig. 3.

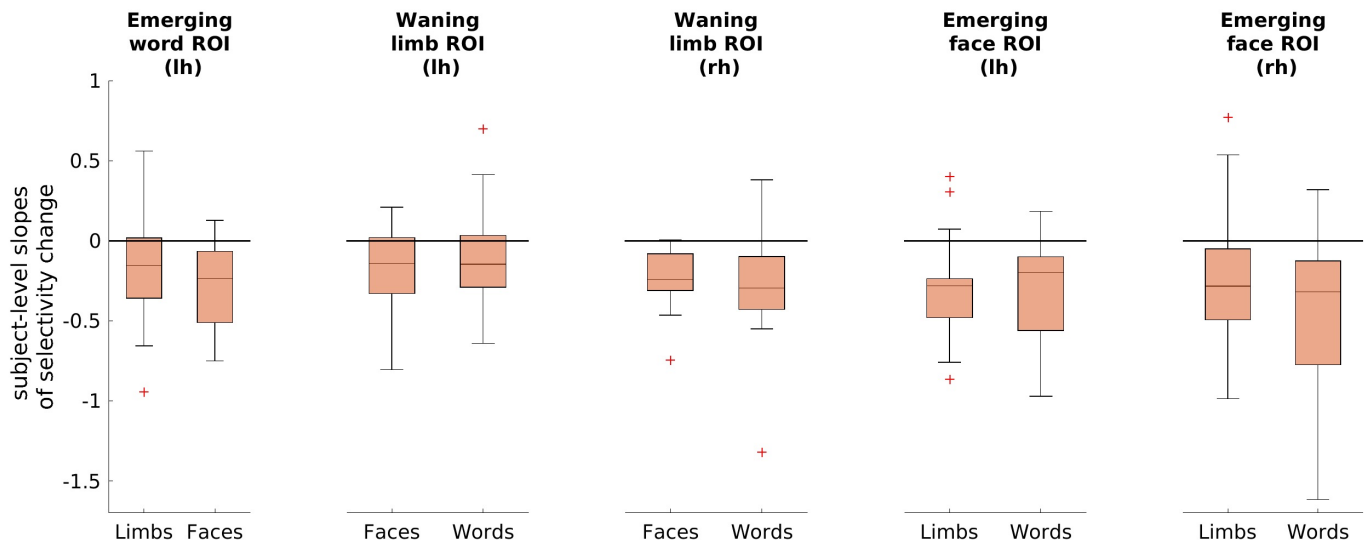

**Supplementary Figure 13. Developmental changes in word-, face-, and limb-selectivity are linked also at the voxel-level.**

An interesting question is whether the observed developmental effects occur at a finer spatial scale than an ROI. Thus, we tested if the link between development of face-, word-, and limb-selectivity is also evident at the voxel-level. We ran LMMs relating selectivity to one category as a function of the two other categories in each participant's waning and emerging category-selective ROIs. LMMs were conducted separately for each participant and ROI and each point in the LMM is a voxel. Boxplots show the individual subject LMM estimates based on voxel data in emerging and waning ROIs. Negative values indicate that increases in voxel selectivity to the category defining the ROI is related to decreases in voxel-selectivity to the other categories (and vice versa). Boxplots show the 75% and 25% percentiles (colored areas) and the median (horizontal lines). Whiskers extend to the most extreme data points not considered outliers (minimum and maximum). *Red crosses*: outliers (values more than 1.5 times the interquartile range away from the bottom or top of the box). Left emerging word ROI: n=24; left waning limb ROI: n=26; right waning limb ROI: n=21; left emerging face ROI: n=22; right emerging face ROI: n=21. Results suggest that cortical recycling also occurs at the voxel level. We find an overall negative relationship between selectivity to the preferred category and the other two categories across voxels of the emerging and waning ROIs within individual subjects as the median of the individual subject LMM slopes is negative in all developing ROIs. While these effects are not significant in all individual participants, they suggest that the negative relationship between selectivity to the preferred category and the other two categories can also be measured at the voxel level. Related to Fig. 4.

## Supplementary Tables

### Supplementary Table 1.

Parameters and statistics of LMMs predicting volume of category-selective activation in lateral VTC ROIs. Related to Fig 1.

| ROI                                                     | Contrast           | parameter | $\beta$ | CI          | df  | t     | $p$                   | $p_{FDR}$ |
|---------------------------------------------------------|--------------------|-----------|---------|-------------|-----|-------|-----------------------|-----------|
| Left lateral VTC<br>(n=29 subjects,<br>n=128 sessions)  | Numbers            | intercept | 426.58  | 104,749     | 126 | 2.62  | 0.01                  |           |
|                                                         |                    | age       | 0.11    | -2.15,2.38  | 126 | 0.10  | 0.92                  | 0.92      |
|                                                         | Words              | intercept | 200.41  | -280, 681   | 126 | 0.82  | 0.41                  |           |
|                                                         |                    | age       | 4.14    | 0.81,7.48   | 126 | 2.46  | 0.015                 | 0.044     |
|                                                         | Limbs              | intercept | 1254.60 | 806,1702    | 126 | 5.54  | $1.7 \times 10^{-7}$  |           |
|                                                         |                    | age       | -3.79   | -6.84,-0.74 | 126 | -2.46 | 0.015                 | 0.044     |
|                                                         | Headless bodies    | intercept | 348.69  | 151,546     | 126 | 3.50  | $6.53 \times 10^{-4}$ |           |
|                                                         |                    | age       | -0.589  | -1.98,0.80  | 126 | -0.84 | 0.40                  | 0.50      |
|                                                         | Adult faces        | intercept | 2.5     | -89,94      | 126 | 0.05  | 0.96                  |           |
|                                                         |                    | age       | 0.89    | 0.26,1.52   | 126 | 2.79  | 0.006                 | 0.040     |
|                                                         | Child faces        | intercept | 62.89   | -112,237    | 126 | 0.71  | 0.48                  |           |
|                                                         |                    | age       | 1.95    | 0.74,3.17   | 126 | 3.18  | 0.002                 | 0.036     |
|                                                         | Cars               | intercept | -15.05  | -120,89.9   | 126 | -0.28 | 0.78                  |           |
|                                                         |                    | age       | 0.52    | -0.22,1.25  | 126 | 1.39  | 0.17                  | 0.31      |
|                                                         | String instruments | intercept | 112.65  | 0.10,225    | 126 | 1.98  | 0.05                  |           |
|                                                         |                    | age       | -0.07   | -0.86,0.72  | 126 | -0.17 | 0.86                  | 0.92      |
|                                                         | Houses             | intercept | -48.32  | -193,96     | 126 | -0.66 | 0.51                  |           |
|                                                         |                    | age       | 1.26    | 0.27,2.25   | 126 | 2.51  | 0.01                  | 0.044     |
|                                                         | Corridors          | intercept | 16.27   | -71,104     | 126 | 0.37  | 0.71                  |           |
|                                                         |                    | age       | 0.38    | -0.23,0.998 | 126 | 1.23  | 0.22                  | 0.37      |
| Right lateral VTC<br>(n=29 subjects,<br>n=128 sessions) | Numbers            | intercept | 281.78  | 26,537      | 126 | 2.18  | 0.03                  |           |
|                                                         |                    | age       | 0.11    | -1.69,1.90  | 126 | 0.12  | 0.91                  | 0.92      |
|                                                         | Words              | intercept | 119.95  | -69,309     | 126 | 1.25  | 0.21                  |           |
|                                                         |                    | age       | 0.66    | -0.66,1.99  | 126 | 0.99  | 0.32                  | 0.46      |
|                                                         | Limbs              | intercept | 978.09  | 632,1325    | 126 | 5.59  | $1.37 \times 10^{-7}$ |           |
|                                                         |                    | age       | -3.42   | -5.79,-1.04 | 126 | -2.85 | 0.005                 | 0.04      |
|                                                         | Headless bodies    | intercept | 588.93  | 299,879     | 126 | 4.02  | $1.0 \times 10^{-4}$  |           |
|                                                         |                    | age       | -1.625  | -3.63,0.38  | 126 | -1.61 | 0.11                  | 0.22      |
|                                                         | Adult faces        | intercept | 3.73    | -140,147    | 126 | 0.05  | 0.96                  |           |
|                                                         |                    | age       | 1.32    | 0.34,2.29   | 126 | 2.68  | 0.008                 | 0.042     |
|                                                         | Child faces        | intercept | 174.96  | -86,436     | 126 | 1.33  | 0.187                 |           |
|                                                         |                    | age       | 2.16    | 0.35,3.97   | 126 | 2.37  | 0.02                  | 0.049     |
|                                                         | Cars               | intercept | 9.67    | -120,139    | 126 | 0.15  | 0.88                  |           |
|                                                         |                    | age       | 0.40    | -0.51,1.31  | 126 | 0.87  | 0.39                  | 0.50      |
|                                                         | String instruments | intercept | 51.87   | 0.16,104    | 126 | 1.99  | 0.05                  |           |
|                                                         |                    | age       | -0.13   | -0.49,0.24  | 126 | -0.69 | 0.49                  | 0.58      |
|                                                         | Houses             | intercept | 75.57   | -114,265    | 126 | 0.79  | 0.43                  |           |
|                                                         |                    | age       | 1.16    | -0.123,2.45 | 126 | 1.79  | 0.08                  | 0.17      |
|                                                         | Corridors          | intercept | 42.67   | -88,173     | 126 | 0.65  | 0.52                  |           |
|                                                         |                    | age       | 0.49    | -0.43,1.4   | 126 | 1.    | 0.29                  | 0.45      |

**Supplementary Table 2.**

Parameters and statistics of LMMs predicting volume of category-selective activation in medial VTC ROIs.  
Related to Fig. 1.

| ROI                                                    | Contrast           | parameter | $\beta$ | CI           | df  | t     | p                     | $p_{FDR}$ |
|--------------------------------------------------------|--------------------|-----------|---------|--------------|-----|-------|-----------------------|-----------|
| Left medial VTC<br>(n=29 subjects,<br>n=128 sessions)  | Numbers            | intercept | 121.4   | 6.07,237     | 126 | 2.08  | 0.04                  |           |
|                                                        |                    | age       | -0.009  | -0.82,0.80   | 126 | -0.02 | 0.98                  | 0.98      |
|                                                        | words              | intercept | 75.21   | -29,180      | 126 | 1.43  | 0.16                  |           |
|                                                        |                    | age       | 0.45    | -0.28,1.18   | 126 | 1.21  | 0.23                  | 0.73      |
|                                                        | limbs              | intercept | 118.10  | 20.6,216     | 126 | 2.40  | 0.02                  |           |
|                                                        |                    | age       | -0.36   | -1.04,0.32   | 126 | -1.05 | 0.29                  | 0.73      |
|                                                        | bodies             | intercept | 57.91   | 5.46,110     | 126 | 2.19  | 0.03                  |           |
|                                                        |                    | age       | -0.21   | -0.58,0.15   | 126 | -1.15 | 0.25                  | 0.73      |
|                                                        | Adult faces        | intercept | 32.33   | 3.15,61.5    | 126 | 2.19  | 0.03                  |           |
|                                                        |                    | age       | -0.05   | -0.24,0.14   | 126 | -0.50 | 0.62                  | 0.88      |
|                                                        | Child faces        | intercept | 76.70   | 2.20,151     | 126 | 2.04  | 0.04                  |           |
|                                                        |                    | age       | 0.09    | -0.39,0.57   | 126 | 0.38  | 0.71                  | 0.88      |
|                                                        | Cars               | intercept | -27.86  | -98,42.26    | 126 | -0.79 | 0.43                  |           |
|                                                        |                    | age       | 0.41    | -0.08,0.90   | 126 | 1.67  | 0.10                  | 0.73      |
|                                                        | String instruments | intercept | 11.47   | -1.69,24.6   | 126 | 1.73  | 0.09                  |           |
|                                                        |                    | age       | -0.04   | -0.13,0.06   | 126 | -0.76 | 0.45                  | 0.82      |
|                                                        | Houses             | intercept | 299.84  | 15.2,584     | 126 | 2.08  | 0.04                  |           |
|                                                        |                    | age       | 1.55    | -0.38,3.47   | 126 | 1.59  | 0.11                  | 0.73      |
|                                                        | Corridors          | intercept | 558.91  | 315,803      | 126 | 4.54  | $1.3 \times 10^{-5}$  |           |
|                                                        |                    | age       | -0.17   | -1.85,1.51   | 126 | -0.20 | 0.84                  | 0.93      |
| Right medial VTC<br>(n=29 subjects,<br>n=128 sessions) | Numbers            | intercept | 32.53   | -32.5,97.5   | 126 | 0.99  | 0.32                  |           |
|                                                        |                    | age       | 0.15    | -0.31,0.61   | 126 | 0.66  | 0.51                  | 0.85      |
|                                                        | words              | intercept | 15.92   | -44,76       | 126 | 0.53  | 0.60                  |           |
|                                                        |                    | age       | 0.22    | -0.20,0.63   | 126 | 1.03  | 0.31                  | 0.73      |
|                                                        | limbs              | intercept | 42.23   | -12,97       | 126 | 1.53  | 0.13                  |           |
|                                                        |                    | age       | 0.02    | -0.36,0.41   | 126 | 0.13  | 0.90                  | 0.95      |
|                                                        | bodies             | intercept | 42.03   | -0.10,84.16  | 126 | 1.97  | 0.05                  |           |
|                                                        |                    | age       | -0.14   | -0.43,0.16   | 126 | -0.91 | 0.37                  | 0.73      |
|                                                        | Adult faces        | intercept | 14.55   | -13.36,42.45 | 126 | 1.03  | 0.30                  |           |
|                                                        |                    | age       | -0.03   | -0.22,0.16   | 126 | -0.31 | 0.75                  | 0.89      |
|                                                        | Child faces        | intercept | 33.50   | -11.7,78.72  | 126 | 1.47  | 0.15                  |           |
|                                                        |                    | age       | -0.06   | -0.37,0.25   | 126 | -0.40 | 0.69                  | 0.88      |
|                                                        | Cars               | intercept | -10.02  | -49.47,29.43 | 126 | -0.50 | 0.62                  |           |
|                                                        |                    | age       | 0.19    | -0.09,0.47   | 126 | 1.34  | 0.18                  | 0.73      |
|                                                        | String instruments | intercept | 13.64   | -0.68,28     | 126 | 1.89  | 0.06                  |           |
|                                                        |                    | age       | -0.05   | -0.15,0.05   | 126 | -0.96 | 0.34                  | 0.73      |
|                                                        | Houses             | intercept | 357.67  | 57.6,657.7   | 126 | 2.36  | 0.02                  |           |
|                                                        |                    | age       | 1.80    | -0.27,3.87   | 126 | 1.72  | 0.09                  | 0.73      |
|                                                        | Corridors          | intercept | 610.52  | 334,887      | 126 | 4.37  | $2.55 \times 10^{-5}$ |           |
|                                                        |                    | age       | 0.46    | -1.43,2.36   | 126 | 0.48  | 0.63                  | 0.88      |

### Supplementary Table 3.

Parameters and statistics of LMMs predicting volume of category-selective activation in lateral VTC ROIs when adult faces, child faces, limbs and words are excluded as control categories from the contrast.

Related to Fig 1 and Extended Data Figure 1.

| ROI                                                     | Contrast           | parameter | $\beta$               | CI                        | df  | t     | $p$                   | $p_{FDR}$ |
|---------------------------------------------------------|--------------------|-----------|-----------------------|---------------------------|-----|-------|-----------------------|-----------|
| Left lateral VTC<br>(n=29 subjects,<br>n=128 sessions)  | Numbers            | intercept | 538.99                | 204,874                   | 126 | 3.19  | 0.002                 |           |
|                                                         |                    | age       | -0.47                 | -2.82,1.88                | 126 | -0.39 | 0.69                  | 0.73      |
|                                                         | Words              | intercept | 291.07                | -185,767                  | 126 | 1.21  | 0.23                  |           |
|                                                         |                    | age       | 3.67                  | 0.36,6.98                 | 126 | 2.19  | 0.03                  | 0.10      |
|                                                         | Limbs              | intercept | 1.23x10 <sup>+3</sup> | 786,1.7x10 <sup>+3</sup>  | 126 | 5.46  | 2.39x10 <sup>-7</sup> |           |
|                                                         |                    | age       | -3.44                 | -6.5,-0.37                | 126 | -2.22 | 0.028                 | 0.10      |
|                                                         | Headless bodies    | intercept | 425                   | 179,672                   | 126 | 3.42  | 8.6x10 <sup>-4</sup>  |           |
|                                                         |                    | age       | -0.71                 | -2.44,1.02                | 126 | -0.81 | 0.42                  | 0.60      |
|                                                         | Adult faces        | intercept | 40.26                 | -72.7,153.2               | 126 | 0.71  | 0.48                  |           |
|                                                         |                    | age       | 0.92                  | 0.15,1.7                  | 126 | 2.35  | 0.02                  | 0.10      |
|                                                         | Child faces        | intercept | 95.42                 | -98.9,289.7               | 126 | 0.97  | 0.33                  |           |
|                                                         |                    | age       | 2.06                  | 0.71,3.41                 | 126 | 3.01  | 0.003                 | 0.056     |
|                                                         | Cars               | intercept | 2.32                  | -122,127                  | 126 | 0.04  | 0.97                  |           |
|                                                         |                    | age       | 0.55                  | -0.33,1.43                | 126 | 1.24  | 0.22                  | 0.36      |
|                                                         | String instruments | intercept | 83.7                  | -104,271                  | 126 | 0.88  | 0.38                  |           |
|                                                         |                    | age       | 0.57                  | -0.75,1.89                | 126 | 0.86  | 0.39                  | 0.60      |
|                                                         | Houses             | intercept | -19.59                | -167,127                  | 126 | -0.26 | 0.79                  |           |
|                                                         |                    | age       | 1.04                  | 0.029,2.06                | 126 | 2.03  | 0.044                 | 0.11      |
|                                                         | Corridors          | intercept | -5.83                 | -89,78                    | 126 | -0.14 | 0.89                  |           |
|                                                         |                    | age       | 0.46                  | -0.12,1.05                | 126 | 1.57  | 0.12                  | 0.22      |
| Right lateral VTC<br>(n=29 subjects,<br>n=128 sessions) | Numbers            | intercept | 310                   | 72.3,547.7                | 126 | 2.58  | 0.011                 |           |
|                                                         |                    | age       | -0.10                 | -1.77,1.57                | 126 | -0.12 | 0.91                  | 0.91      |
|                                                         | Words              | intercept | 143.45                | -41,327.9                 | 126 | 1.54  | 0.13                  |           |
|                                                         |                    | age       | 0.45                  | -0.84,1.74                | 126 | 0.69  | 0.49                  | 0.61      |
|                                                         | Limbs              | intercept | 1.02x10 <sup>+3</sup> | 663,1.38x10 <sup>+3</sup> | 126 | 5.63  | 1.09x10 <sup>-7</sup> |           |
|                                                         |                    | age       | -3.51                 | -5.98,-1.04               | 126 | -2.82 | 0.0056                | 0.056     |
|                                                         | Headless bodies    | intercept | 683                   | 382,983                   | 126 | 4.5   | 1.54x10 <sup>-5</sup> |           |
|                                                         |                    | age       | -1.62                 | -3.68,0.45                | 126 | -1.55 | 0.12                  | 0.22      |
|                                                         | Adult faces        | intercept | 47.12                 | -112,206                  | 126 | 0.59  | 0.56                  |           |
|                                                         |                    | age       | 1.22                  | 0.13,2.30                 | 126 | 2.22  | 0.029                 | 0.10      |
|                                                         | Child faces        | intercept | 210                   | -60.6,481                 | 126 | 1.54  | 0.13                  |           |
|                                                         |                    | age       | 2.02                  | 0.14,3.90                 | 126 | 2.12  | 0.036                 | 0.10      |
|                                                         | Cars               | intercept | 41.21                 | -77.8,160.2               | 126 | 0.69  | 0.49                  |           |
|                                                         |                    | age       | 0.24                  | -0.59,1.08                | 126 | 0.58  | 0.56                  | 0.66      |
|                                                         | String instruments | intercept | 68.02                 | -0.94,137                 | 126 | 1.95  | 0.053                 |           |
|                                                         |                    | age       | -0.12                 | -0.60,0.37                | 126 | -0.48 | 0.63                  | 0.70      |
|                                                         | Houses             | intercept | 61.84                 | -110,234                  | 126 | 0.71  | 0.48                  |           |
|                                                         |                    | age       | 1.13                  | -0.06,2.31                | 126 | 1.89  | 0.06                  | 0.14      |
|                                                         | Corridors          | intercept | 55.26                 | -59.7,170.23              | 126 | 0.95  | 0.34                  |           |
|                                                         |                    | age       | 0.30                  | -0.51,1.10                | 126 | 0.72  | 0.47                  | 0.61      |

### Supplementary Table 4.

Parameters and statistics of LMMs predicting volume of category-selective activation in medial VTC ROIs when adult faces, child faces, limbs and words are excluded as control categories from the contrast.

Related to Fig 1 and Extended Data Figure 1.

| ROI                                                    | Contrast           | parameter | $\beta$               | CI            | df  | t     | $p$                   | $p_{FDR}$ |
|--------------------------------------------------------|--------------------|-----------|-----------------------|---------------|-----|-------|-----------------------|-----------|
| Left medial VTC<br>(n=29 subjects,<br>n=128 sessions)  | Numbers            | intercept | 119                   | 15.77,222.92  | 126 | 2.28  | 0.024                 |           |
|                                                        |                    | age       | -0.20                 | -0.92,0.52    | 126 | -0.55 | 0.58                  | 0.75      |
|                                                        | words              | intercept | 77.36                 | -19.86,174.59 | 126 | 1.57  | 0.12                  |           |
|                                                        |                    | age       | 0.27                  | -0.41,0.95    | 126 | 0.79  | 0.43                  | 0.75      |
|                                                        | limbs              | intercept | 117.82                | 23.60,212.03  | 126 | 2.47  | 0.015                 |           |
|                                                        |                    | age       | -0.41                 | -1.06,0.23    | 126 | -1.27 | 0.21                  | 0.59      |
|                                                        | bodies             | intercept | 82.69                 | 16.3,149.1    | 126 | 2.46  | 0.015                 |           |
|                                                        |                    | age       | -0.30                 | -0.76,0.15    | 126 | -1.32 | 0.19                  | 0.59      |
|                                                        | Adult faces        | intercept | 47.41                 | 9.96,84.87    | 126 | 2.51  | 0.014                 |           |
|                                                        |                    | age       | -0.09                 | -0.34,0.15    | 126 | -0.75 | 0.46                  | 0.75      |
|                                                        | Child faces        | intercept | 91.55                 | 12.5,170.6    | 126 | 2.29  | 0.02                  |           |
|                                                        |                    | age       | 0.034                 | -0.47,0.54    | 126 | 0.13  | 0.89                  | 0.94      |
|                                                        | Cars               | intercept | -13.1                 | -63.49,37.29  | 126 | -0.51 | 0.61                  |           |
|                                                        |                    | age       | 0.24                  | -0.11,0.59    | 126 | 1.36  | 0.18                  | 0.59      |
|                                                        | String instruments | intercept | 5.42                  | -3.45,14.3    | 126 | 1.21  | 0.23                  |           |
|                                                        |                    | age       | $9.35 \times 10^{-4}$ | -0.06,0.06    | 126 | 0.03  | 0.98                  | 0.98      |
|                                                        | Houses             | intercept | 277.7                 | 17.53,537.9   | 126 | 2.11  | 0.037                 |           |
|                                                        |                    | age       | 1.24                  | -0.51,2.99    | 126 | 1.40  | 0.16                  | 0.59      |
|                                                        | Corridors          | intercept | 531.26                | 302.7,759.8   | 126 | 4.6   | $1.02 \times 10^{-5}$ |           |
|                                                        |                    | age       | -0.47                 | -2.05,1.11    | 126 | -0.59 | 0.56                  | 0.75      |
| Right medial VTC<br>(n=29 subjects,<br>n=128 sessions) | Numbers            | intercept | 15.6                  | -26.9,58.16   | 126 | 0.73  | 0.47                  |           |
|                                                        |                    | age       | 0.08                  | -0.22,0.38    | 126 | 0.53  | 0.59                  | 0.75      |
|                                                        | words              | intercept | 0.21                  | -33.39,33.8   | 126 | 0.013 | 0.99                  |           |
|                                                        |                    | age       | 0.15                  | -0.08,0.39    | 126 | 1.27  | 0.21                  | 0.59      |
|                                                        | limbs              | intercept | 36.33                 | 1.49,71.18    | 126 | 2.06  | 0.04                  |           |
|                                                        |                    | age       | -0.08                 | -0.33,0.16    | 126 | -0.69 | 0.49                  | 0.75      |
|                                                        | bodies             | intercept | 41.38                 | -6.89,89.65   | 126 | 1.7   | 0.09                  |           |
|                                                        |                    | age       | -0.12                 | -0.46,0.22    | 126 | -0.71 | 0.48                  | 0.75      |
|                                                        | Adult faces        | intercept | 18.18                 | -10.28,46.64  | 126 | 1.26  | 0.21                  |           |
|                                                        |                    | age       | -0.05                 | -0.25,0.14    | 126 | -0.53 | 0.60                  | 0.75      |
|                                                        | Child faces        | intercept | 34.03                 | -10.64,78.69  | 126 | 1.51  | 0.13                  |           |
|                                                        |                    | age       | -0.06                 | -0.37,0.24    | 126 | -0.41 | 0.68                  | 0.77      |
|                                                        | Cars               | intercept | -9.74                 | -30.26,10.77  | 126 | -0.94 | 0.35                  |           |
|                                                        |                    | age       | 0.13                  | -0.02,0.27    | 126 | 1.76  | 0.08                  | 0.59      |
|                                                        | String instruments | intercept | 0.37                  | -7.26,8.01    | 126 | 0.097 | 0.92                  |           |
|                                                        |                    | age       | 0.028                 | -0.026,0.08   | 126 | 1.01  | 0.31                  | 0.75      |
|                                                        | Houses             | intercept | 326.7                 | 37.69,615.63  | 126 | 2.24  | 0.027                 |           |
|                                                        |                    | age       | 1.54                  | -0.46,3.53    | 126 | 1.53  | 0.13                  | 0.59      |
|                                                        | Corridors          | intercept | 555.76                | 288.8,822.7   | 126 | 4.12  | $6.8 \times 10^{-5}$  |           |
|                                                        |                    | age       | 0.37                  | -1.46,2.20    | 126 | 0.40  | 0.69                  | 0.77      |



**Supplementary Table 5.**

Likelihood ratio tests determining if the number of selective voxels in VTC is better predicted if motion during scanning is included in the model. Related to Fig. 1.

| ROI               | contrast      | No. | Model                                       | df | LRStat | <i>p</i> | <i>pFDR</i> |
|-------------------|---------------|-----|---------------------------------------------|----|--------|----------|-------------|
| Left lateral VTC  | numbers       | 1   | Nr of Sel. voxels ~ age + (1 subj)          | 4  |        |          |             |
|                   |               | 2   | Nr of Sel. voxels ~ age + motion + (1 subj) | 5  | 1.17   | 0.28     | 0.66        |
|                   | words         | 1   | Nr of Sel. voxels ~ age + (1 subj)          | 4  |        |          |             |
|                   |               | 2   | Nr of Sel. voxels ~ age + motion + (1 subj) | 5  | 0.39   | 0.53     | 0.79        |
|                   | limbs         | 1   | Nr of Sel. voxels ~ age+ (1 subj)           | 4  |        |          |             |
|                   |               | 2   | Nr of Sel. voxels ~ age+ motion+ (1 subj)   | 5  | 0.83   | 0.36     | 0.66        |
|                   | bodies        | 1   | Nr of Sel. voxels ~ age+ (1 subj)           | 4  |        |          |             |
|                   |               | 2   | Nr of Sel. voxels ~ age+ motion+ (1 subj)   | 5  | 0.009  | 0.93     | 0.93        |
|                   | adult faces   | 1   | Nr of Sel. voxels ~ age + (1 subj)          | 4  |        |          |             |
|                   |               | 2   | Nr of Sel. voxels ~ age+ motion + (1 subj)  | 5  | 0.12   | 0.73     | 0.89        |
|                   | child faces   | 1   | Nr of Sel. voxels ~ age + (1 subj)          | 4  |        |          |             |
|                   |               | 2   | Nr of Sel. voxels ~ age + motion + (1 subj) | 5  | 0.21   | 0.64     | 0.86        |
|                   | cars          | 1   | Nr of Sel. voxels ~ age + (1 subj)          | 4  |        |          |             |
|                   |               | 2   | Nr of Sel. voxels ~ age + motion + (1 subj) | 5  | 3.02   | 0.08     | 0.66        |
|                   | string instr. | 1   | Nr of Sel. voxels ~ age+ (1 subj)           | 4  |        |          |             |
|                   |               | 2   | Nr of Sel. voxels ~ age+ motion+ (1 subj)   | 5  | 3.43   | 0.06     | 0.66        |
|                   | houses        | 1   | Nr of Sel. voxels ~ age+ (1 subj)           | 4  |        |          |             |
|                   |               | 2   | Nr of Sel. voxels ~ age+ motion+ (1 subj)   | 5  | 0.007  | 0.93     | 0.93        |
|                   | corridors     | 1   | Nr of Sel. voxels ~ age+ (1 subj)           | 4  |        |          |             |
|                   |               | 2   | Nr of Sel. voxels ~ age+ motion+ (1 subj)   | 5  | 2.13   | 0.14     | 0.66        |
| Right lateral VTC | numbers       | 1   | Nr of Sel. voxels ~ age + (1 subj)          | 4  |        |          |             |
|                   |               | 2   | Nr of Sel. voxels ~ age + motion + (1 subj) | 5  | 0.01   | 0.92     | 0.93        |
|                   | words         | 1   | Nr of Sel. voxels ~ age + (1 subj)          | 4  |        |          |             |
|                   |               | 2   | Nr of Sel. voxels ~ age + motion + (1 subj) | 5  | 1.23   | 0.27     | 0.66        |
|                   | limbs         | 1   | Nr of Sel. voxels ~ age+ (1 subj)           | 4  |        |          |             |
|                   |               | 2   | Nr of Sel. voxels ~ age+ motion+ (1 subj)   | 5  | 0.10   | 0.75     | 0.89        |
|                   | bodies        | 1   | Nr of Sel. voxels ~ age + (1 subj)          | 4  |        |          |             |
|                   |               | 2   | Nr of Sel. voxels ~ age+ motion + (1 subj)  | 5  | 0.61   | 0.43     | 0.72        |
|                   | adult faces   | 1   | Nr of Sel. voxels ~ age + (1 subj)          | 4  |        |          |             |
|                   |               | 2   | Nr of Sel. voxels ~ age + motion + (1 subj) | 5  | 0.82   | 0.36     | 0.66        |
|                   | child faces   | 1   | Nr of Sel. voxels ~ age + (1 subj)          | 4  |        |          |             |
|                   |               | 2   | Nr of Sel. voxels ~ age + motion + (1 subj) | 5  | 0.86   | 0.35     | 0.66        |
|                   | cars          | 1   | Nr of Sel. voxels ~ age+ (1 subj)           | 4  |        |          |             |
|                   |               | 2   | Nr of Sel. voxels ~ age+ motion+ (1 subj)   | 5  | 1.28   | 0.26     | 0.66        |
|                   | string instr. | 1   | Nr of Sel. voxels ~ age + (1 subj)          | 4  |        |          |             |
|                   |               | 2   | Nr of Sel. voxels ~ age+ motion + (1 subj)  | 5  | 1.60   | 0.21     | 0.66        |
|                   | houses        | 1   | Nr of Sel. voxels ~ age+ (1 subj)           | 4  |        |          |             |
|                   |               | 2   | Nr of Sel. voxels ~ age+ motion+ (1 subj)   | 5  | 0.97   | 0.33     | 0.66        |
|                   | corridors     | 1   | Nr of Sel. voxels ~ age + (1 subj)          | 4  |        |          |             |
|                   |               | 2   | Nr of Sel. voxels ~ age+ motion + (1 subj)  | 5  | 0.35   | 0.55     | 0.79        |

**Supplementary Table 6.**

Parameters and statistics of LMMs predicting volume of category-selective activation in lateral VTC ROIs with the additional factor of tSNR. Related to Fig. 1 and Extended Data Figure 1.

| ROI                                                     | contrast      | pValue of LR-Test        | parameter | $\beta$                       | CI                         | df    | t     | p                     | P FDR |
|---------------------------------------------------------|---------------|--------------------------|-----------|-------------------------------|----------------------------|-------|-------|-----------------------|-------|
|                                                         |               | Model <sub>age</sub> vs. |           | model <sub>Age_and_tSNR</sub> |                            |       |       |                       |       |
| Lateral VTC lh<br>(n=29 subjects,<br>n=128<br>sessions) | numbers       | 0.10                     | Intercept | 30.89                         | -531,593                   | 125   | 0.11  | 0.91                  |       |
|                                                         |               |                          | age       | 0.2                           | -2.11,2.51                 | 125   | 0.17  | 0.86                  | 0.86  |
|                                                         |               |                          | tSNR      | 5.08                          | -0.78,10.94                | 125   | 1.72  | 0.089                 |       |
|                                                         | words         | 0.02                     | Intercept | -579                          | -1.4x10 <sup>+3</sup> ,219 | 125   | -1.44 | 0.153                 |       |
|                                                         |               |                          | age       | 4.48                          | 1.20,7.76                  | 125   | 2.7   | 0.008                 | 0.03  |
|                                                         |               |                          | tSNR      | 9.76                          | 1.69,17.82                 | 125   | 2.39  | 0.018                 |       |
|                                                         | limbs         | 8.98x10 <sup>-04</sup>   | Intercept | 278                           | -440,995                   | 125   | 0.77  | 0.45                  |       |
|                                                         |               |                          | age       | -3.33                         | -6.3,-0.4                  | 125   | -2.24 | 0.027                 | 0.068 |
|                                                         |               |                          | tSNR      | 12.13                         | 5.08,19.19                 | 125   | 3.4   | 8.95x10 <sup>-4</sup> |       |
|                                                         | bodies        | 0.02                     | Intercept | 30.98                         | -308,370                   | 125   | 0.18  | 0.86                  |       |
|                                                         |               |                          | age       | -0.64                         | -2.03,0.76                 | 125   | -0.9  | 0.37                  | 0.49  |
|                                                         |               |                          | tSNR      | 4.28                          | 0.72,7.85                  | 125   | 2.38  | 0.02                  |       |
|                                                         | Adult faces   | 0.15                     | Intercept | -87                           | -240,65.3                  | 125   | -1.13 | 0.26                  |       |
|                                                         |               |                          | age       | 0.93                          | 0.30,1.56                  | 125   | 2.94  | 0.0039                | 0.02  |
|                                                         |               |                          | tSNR      | 1.12                          | -0.41,2.65                 | 125   | 1.45  | 0.15                  |       |
|                                                         | Child faces   | 0.03                     | Intercept | -190.99                       | -482,100                   | 125   | -1.3  | 0.2                   |       |
|                                                         |               |                          | age       | 2.05                          | 0.85,3.25                  | 125   | 3.39  | 9.48x10 <sup>-4</sup> | 0.006 |
|                                                         |               |                          | tSNR      | 3.2                           | 0.2,6.2                    | 125   | 2.14  | 0.03                  |       |
|                                                         | Cars          | 0.18                     | Intercept | -110                          | -286,65                    | 125   | -1.25 | 0.22                  |       |
|                                                         |               |                          | age       | 0.51                          | -0.23,1.24                 | 125   | 1.37  | 0.17                  | 0.35  |
|                                                         |               |                          | tSNR      | 1.27                          | -0.61,3.15                 | 125   | 1.34  | 0.18                  |       |
|                                                         | String instr. | 0.03                     | Intercept | -51.15                        | -237,135                   | 125   | -0.54 | 0.59                  |       |
|                                                         |               |                          | age       | -0.09                         | -0.86,0.69                 | 125   | -0.22 | 0.83                  | 0.86  |
|                                                         |               |                          | tSNR      | 2.18                          | 0.19,4.17                  | 125   | 2.17  | 0.03                  |       |
| Houses                                                  | 0.37          | Intercept                | 40.42     | -201,282                      | 125                        | 0.33  | 0.74  |                       |       |
|                                                         |               | age                      | 1.21      | 0.22,2.2                      | 125                        | 2.41  | 0.017 | 0.049                 |       |
|                                                         |               | tSNR                     | -1.09     | -3.49,1.3                     | 125                        | -0.9  | 0.37  |                       |       |
| Corridors                                               | 0.54          | Intercept                | 53.78     | -95.7,203.2                   | 125                        | 0.71  | 0.48  |                       |       |
|                                                         |               | age                      | 0.38      | -0.24,0.99                    | 125                        | 1.22  | 0.23  | 0.38                  |       |
|                                                         |               | tSNR                     | -0.49     | -2.06,1.09                    | 125                        | -0.61 | 0.54  |                       |       |
| Lateral VTC rh<br>(n=29 subjects,<br>n=128<br>sessions) | numbers       | 0.16                     | Intercept | 26.25                         | -409.9,462.4               | 125   | 0.12  | 0.91                  |       |
|                                                         |               |                          | age       | 0.2                           | -1.64,2.04                 | 125   | 0.22  | 0.83                  | 0.86  |
|                                                         |               |                          | tSNR      | 3.46                          | -1.17,8.09                 | 125   | 1.48  | 0.14                  |       |
|                                                         | words         | 0.41                     | Intercept | 9.35                          | -309,327                   | 125   | 0.06  | 0.95                  |       |
|                                                         |               |                          | age       | 0.72                          | -0.62,2.06                 | 125   | 1.06  | 0.29                  | 0.45  |
|                                                         |               |                          | tSNR      | 1.47                          | -1.85,4.79                 | 125   | 0.88  | 0.38                  |       |
|                                                         | limbs         | 0.02                     | Intercept | 432.91                        | -120,986                   | 125   | 1.55  | 0.12                  |       |
|                                                         |               |                          | age       | -2.99                         | -5.33,-0.66                | 125   | -2.54 | 0.012                 | 0.04  |
|                                                         |               |                          | tSNR      | 6.96                          | 1.3,12.6                   | 125   | 2.43  | 0.016                 |       |
|                                                         | bodies        | 0.01                     | Intercept | 122                           | -345,590                   | 125   | 0.52  | 0.61                  |       |

|               |                       |           |         |                              |     |       |                       |       |
|---------------|-----------------------|-----------|---------|------------------------------|-----|-------|-----------------------|-------|
|               |                       | age       | -1.3    | -3.28,0.67                   | 125 | -1.3  | 0.19                  | 0.35  |
|               |                       | tSNR      | 6.04    | 1.24,10.84                   | 125 | 2.49  | 0.01                  |       |
| Adult faces   | $3.84 \times 10^{-5}$ | Intercept | -372    | -589,-154                    | 125 | -3.39 | $9.32 \times 10^{-4}$ |       |
|               |                       | age       | 1.6     | 0.69,2.52                    | 125 | 3.46  | $7.39 \times 10^{-4}$ | 0.006 |
|               |                       | tSNR      | 4.82    | 2.61,7.04                    | 125 | 4.31  | $3.29 \times 10^{-5}$ |       |
| Child faces   | $4.72 \times 10^{-8}$ | Intercept | -723.36 | $-1.1 \times 10^{+3}$ , -346 | 125 | -3.79 | $2.30 \times 10^{-4}$ |       |
|               |                       | age       | 2.78    | 1.19,4.38                    | 125 | 3.46  | $7.44 \times 10^{-4}$ | 0.006 |
|               |                       | tSNR      | 11.63   | 7.7,15.6                     | 125 | 5.86  | $3.83 \times 10^{-8}$ |       |
| Cars          | 0.40                  | Intercept | 83.84   | -132.2,299.9                 | 125 | 0.77  | 0.44                  |       |
|               |                       | age       | 0.36    | -0.55,1.27                   | 125 | 0.78  | 0.44                  | 0.55  |
|               |                       | tSNR      | -0.97   | -3.25,1.30                   | 125 | -0.85 | 0.40                  |       |
| String instr. | 0.23                  | Intercept | 9.87    | -75.9,95.6                   | 125 | 0.23  | 0.82                  |       |
|               |                       | age       | -0.11   | -0.48,0.25                   | 125 | -0.62 | 0.54                  | 0.63  |
|               |                       | tSNR      | 0.57    | -0.4,1.5                     | 125 | 1.21  | 0.23                  |       |
| Houses        | 0.51                  | Intercept | -4.43   | -312,304                     | 125 | -0.03 | 0.98                  |       |
|               |                       | age       | 1.22    | -0.08,2.52                   | 125 | 1.86  | 0.06                  | 0.14  |
|               |                       | tSNR      | 1.02    | -2.09,4.14                   | 125 | 0.65  | 0.52                  |       |
| Corridors     | 0.73                  | Intercept | 74.14   | -143,291                     | 125 | 0.68  | 0.50                  |       |
|               |                       | age       | 0.47    | -0.45,1.38                   | 125 | 1.01  | 0.32                  | 0.45  |
|               |                       | tSNR      | -0.41   | -2.69,1.88                   | 125 | -0.35 | 0.73                  |       |

Note, LR-Test: Likelihood Ratio test.

**Supplementary Table 7.**

Parameters and statistics of LMMs predicting volume of category-selective activation in medial VTC ROIs with the additional factor of tSNR. Related to Fig. 1 and Extended Data Figure 1.

| ROI                                                    | contrast              | pVal of LR-Test               | parameter | $\beta$    | CI           | df    | t                     | $p$                   | $P$<br>FDR |
|--------------------------------------------------------|-----------------------|-------------------------------|-----------|------------|--------------|-------|-----------------------|-----------------------|------------|
|                                                        |                       | Model <sub>age</sub> vs       |           |            |              |       |                       |                       |            |
|                                                        |                       | model <sub>age_and_tSNR</sub> |           |            |              |       |                       |                       |            |
| medial VTC lh<br>(n=29 subjects,<br>n=128<br>sessions) | numbers               | 1.81x10 <sup>-4</sup>         | Intercept | -232       | -443,-21     | 125   | -2.18                 | 0.03                  |            |
|                                                        |                       |                               | age       | 0.29       | -0.49,1.06   | 125   | 0.73                  | 0.47                  | 0.67       |
|                                                        |                       |                               | tSNR      | 4.84       | 2.35, 7.33   | 125   | 3.85                  | 1.87x10 <sup>-4</sup> |            |
|                                                        | words                 | 0.24                          | Intercept | -29.63     | -232,173     | 125   | -0.29                 | 0.77                  |            |
|                                                        |                       |                               | age       | 0.54       | -0.21,1.29   | 125   | 1.43                  | 0.15                  | 0.56       |
|                                                        |                       |                               | tSNR      | 1.43       | -0.95,3.81   | 125   | 1.19                  | 0.24                  |            |
|                                                        | limbs                 | 0.15                          | Intercept | 2.74       | -180,186     | 125   | 0.03                  | 0.98                  |            |
|                                                        |                       |                               | age       | -0.26      | -0.94,0.43   | 125   | -0.74                 | 0.46                  | 0.67       |
|                                                        |                       |                               | tSNR      | 1.57       | -0.55,3.68   | 125   | 1.46                  | 0.15                  |            |
|                                                        | bodies                | 0.46                          | Intercept | 89.26      | -9.56,188.08 | 125   | 1.79                  | 0.08                  |            |
|                                                        |                       |                               | age       | -0.24      | -0.61,0.13   | 125   | -1.28                 | 0.20                  | 0.56       |
|                                                        |                       |                               | tSNR      | -0.42      | -1.56,0.71   | 125   | -0.74                 | 0.46                  |            |
|                                                        | Adult faces           | 0.06                          | Intercept | -6.98      | -57.8,43.8   | 125   | -0.27                 | 0.79                  |            |
|                                                        |                       |                               | age       | -0.01      | -0.21,0.18   | 125   | -0.12                 | 0.91                  | 0.91       |
|                                                        |                       |                               | tSNR      | 0.53       | -0.03,1.09   | 125   | 1.88                  | 0.06                  |            |
|                                                        | Child faces           | 0.047                         | Intercept | -28.87     | -156,98.7    | 125   | -0.45                 | 0.65                  |            |
|                                                        |                       |                               | age       | 0.2        | -0.29,0.69   | 125   | 0.81                  | 0.42                  | 0.67       |
|                                                        |                       |                               | tSNR      | 1.4        | 0.01,2.8     | 125   | 2.0                   | 0.048                 |            |
|                                                        | Cars                  | 0.56                          | Intercept | -61.36     | -195,73      | 125   | -0.91                 | 0.37                  |            |
|                                                        |                       |                               | age       | 0.44       | -0.06,0.94   | 125   | 1.76                  | 0.08                  | 0.54       |
|                                                        |                       |                               | tSNR      | 0.46       | -1.1,2.02    | 125   | 0.58                  | 0.56                  |            |
|                                                        | String instr.         | 0.18                          | Intercept | 26.45      | 2.15,50.74   | 125   | 2.15                  | 0.03                  |            |
|                                                        |                       |                               | age       | -0.04      | -0.13,0.05   | 125   | -0.85                 | 0.40                  | 0.67       |
|                                                        |                       |                               | tSNR      | -0.23      | -0.52,0.07   | 125   | -1.52                 | 0.13                  |            |
| Houses                                                 | 2.62x10 <sup>-4</sup> | Intercept                     | -478      | -968,11.7  | 125          | -1.93 | 0.06                  |                       |            |
|                                                        |                       | age                           | 2.31      | 0.44,4.18  | 125          | 2.45  | 0.02                  | 0.18                  |            |
|                                                        |                       | tSNR                          | 10.44     | 4.9,15.9   | 125          | 3.75  | 2.68x10 <sup>-4</sup> |                       |            |
| Corridors                                              | 1.13x10 <sup>-4</sup> | Intercept                     | -167      | -595,261   | 125          | -0.77 | 0.44                  |                       |            |
|                                                        |                       | age                           | 0.49      | -1.12,2.11 | 125          | 0.60  | 0.55                  | 0.73                  |            |
|                                                        |                       | tSNR                          | 9.83      | 4.9,14.7   | 125          | 3.98  | 1.18x10 <sup>-4</sup> |                       |            |
| medial VTC rh<br>(n=29 subjects,<br>n=128<br>sessions) | numbers               | 0.26                          | Intercept | -30.15     | -169,109     | 125   | -0.43                 | 0.67                  |            |
|                                                        |                       |                               | age       | 0.11       | -0.37,0.6    | 125   | 0.46                  | 0.65                  | 0.76       |
|                                                        |                       |                               | tSNR      | 1.17       | -0.68,3.03   | 125   | 1.25                  | 0.21                  |            |
|                                                        | words                 | 0.57                          | Intercept | -13.23     | -133, 106    | 125   | -0.22                 | 0.83                  |            |
|                                                        |                       |                               | age       | 0.24       | -0.19,0.67   | 125   | 1.11                  | 0.27                  | 0.56       |
|                                                        |                       |                               | tSNR      | 0.45       | -1.12,2.02   | 125   | 0.57                  | 0.57                  |            |
|                                                        | limbs                 | 0.24                          | Intercept | -15.51     | -126,95      | 125   | -0.28                 | 0.78                  |            |
|                                                        |                       |                               | age       | 0.07       | -0.32,0.46   | 125   | 0.35                  | 0.73                  | 0.81       |
|                                                        |                       |                               | tSNR      | 0.89       | -0.58,2.36   | 125   | 1.19                  | 0.24                  |            |
|                                                        | bodies                | 0.39                          | Intercept | 74.48      | -9.6,158.57  | 125   | 1.75                  | 0.08                  |            |

|               |                       |           |        |                           |     |       |                       |      |
|---------------|-----------------------|-----------|--------|---------------------------|-----|-------|-----------------------|------|
|               |                       | age       | -0.16  | -0.46,0.14                | 125 | -1.08 | 0.28                  | 0.56 |
|               |                       | tSNR      | -0.49  | -1.60,0.62                | 125 | -0.88 | 0.38                  |      |
| Adult faces   | 0.68                  | Intercept | 4.66   | -50.09,59.40              | 125 | 0.17  | 0.87                  |      |
|               |                       | age       | -0.022 | -0.22,0.18                | 125 | -0.22 | 0.83                  | 0.87 |
|               |                       | tSNR      | 0.15   | -0.56,0.86                | 125 | 0.41  | 0.68                  |      |
| Child faces   | 0.68                  | Intercept | 49.05  | -37.7,135.8               | 125 | 1.12  | 0.27                  |      |
|               |                       | age       | -0.08  | -0.39,0.24                | 125 | -0.48 | 0.64                  | 0.76 |
|               |                       | tSNR      | -0.23  | -1.35,0.88                | 125 | -0.42 | 0.68                  |      |
| Cars          | 0.87                  | Intercept | -3.5   | -85.76,78.75              | 125 | -0.08 | 0.93                  |      |
|               |                       | age       | 0.18   | -0.10,0.47                | 125 | 1.27  | 0.21                  | 0.56 |
|               |                       | tSNR      | -0.1   | -1.21,1.01                | 125 | -0.18 | 0.86                  |      |
| String instr. | 0.13                  | Intercept | 34.28  | 4.74,63.83                | 125 | 2.30  | 0.02                  |      |
|               |                       | age       | -0.07  | -0.17,0.04                | 125 | -1.29 | 0.2                   | 0.56 |
|               |                       | tSNR      | -0.31  | -0.70,0.08                | 125 | -1.56 | 0.12                  |      |
| Houses        | $4.65 \times 10^{-4}$ | Intercept | -504   | $-1.1 \times 10^{+3}, 57$ | 125 | -1.78 | 0.08                  |      |
|               |                       | age       | 2.45   | 0.42,4.48                 | 125 | 2.39  | 0.02                  | 0.18 |
|               |                       | tSNR      | 13.26  | 6.0,20.5                  | 125 | 3.6   | $4.37 \times 10^{-4}$ |      |
| Corridors     | $2.11 \times 10^{-4}$ | Intercept | -219   | -727,288                  | 125 | -0.86 | 0.39                  |      |
|               |                       | age       | 1.14   | -0.70,2.98                | 125 | 1.22  | 0.22                  | 0.56 |
|               |                       | tSNR      | 12.66  | 6.12,19.2                 | 125 | 3.83  | $1.99 \times 10^{-4}$ |      |

**Supplementary Table 8.**

Parameters and statistics of LMMs predicting ROI volume. Related to Fig. 2.

| ROI                                                 | parameter | $\beta$ | CI           | df  | t     | $p$                   | $p_{FDR}$ |
|-----------------------------------------------------|-----------|---------|--------------|-----|-------|-----------------------|-----------|
| Left mOTS-words<br>(n=23 subjects, n=103 sessions)  | intercept | 130.61  | -39.93,301   | 101 | 1.52  | 0.13                  |           |
|                                                     | age       | -0.07   | -1.22,1.08   | 101 | -0.12 | 0.90                  | 0.90      |
| Right mOTS-words<br>(n=7 subjects, n= 35 sessions)  | intercept | 8.93    | -95.1,113    | 33  | 0.17  | 0.86                  |           |
|                                                     | age       | 0.25    | -0.43,0.92   | 33  | 0.74  | 0.46                  | 0.66      |
| Left pOTS-words<br>(n=26 subjects, n= 119 sessions) | intercept | -19.96  | -205,165     | 117 | -0.21 | 0.83                  |           |
|                                                     | age       | 1.71    | 0.45,2.98    | 117 | 2.68  | 0.009                 | 0.02      |
| Right pOTS-words<br>(n=16 subjects, n=73 sessions)  | intercept | 21.33   | -73.9,116.6  | 71  | 0.45  | 0.66                  |           |
|                                                     | age       | 0.37    | -0.32,1.06   | 71  | 1.07  | 0.29                  | 0.48      |
| Left OTS-limbs<br>(n=28 subjects, n=126 sessions)   | intercept | 369.43  | 217,522      | 124 | 4.80  | $4.40 \times 10^{-6}$ |           |
|                                                     | age       | -1.70   | -2.59,-0.81  | 124 | -3.78 | $2.40 \times 10^{-4}$ | 0.002     |
| Right OTS-limbs<br>(n=28 subjects, n=126 sessions)  | intercept | 204.46  | 105,304      | 124 | 4.07  | $8.41 \times 10^{-5}$ |           |
|                                                     | age       | -0.89   | -1.53,-0.24  | 124 | -2.73 | 0.007                 | 0.02      |
| Left mFus-faces<br>(n=23 subjects, n=107 sessions)  | intercept | 99.77   | 7.39,192     | 105 | 2.14  | 0.03                  |           |
|                                                     | age       | 0.11    | -0.47,0.69   | 105 | 0.38  | 0.71                  | 0.79      |
| Right mFus-faces<br>(n=23 subjects, n=102 sessions) | intercept | 90.54   | -6.41,187.48 | 100 | 1.85  | 0.07                  |           |
|                                                     | age       | 0.20    | -0.46,0.85   | 100 | 0.60  | 0.55                  | 0.69      |
| Left pFus-faces<br>(n=27 subjects, n=120 sessions)  | intercept | 23.36   | -64.37,111.1 | 118 | 0.53  | 0.60                  |           |
|                                                     | age       | 0.75    | 0.17,1.33    | 118 | 2.55  | 0.01                  | 0.02      |
| Right pFus-Faces<br>(n=22 subjects, n=98 sessions)  | intercept | -23.39  | -163,116     | 96  | -0.33 | 0.74                  |           |
|                                                     | age       | 1.41    | 0.46,2.35    | 96  | 2.96  | 0.004                 | 0.019     |

### Supplementary Table 9.

Parameters and statistics of LMMs predicting changes in selectivity by age in the developing parts of category-selective ROIs. Listed by figure order. Related to Fig. 3 and Extended Data Fig. 2.

| ROI                                                         | Contrast      | parameter | $\beta$                | CI                           | df  | t     | p                      | p FDR                 |
|-------------------------------------------------------------|---------------|-----------|------------------------|------------------------------|-----|-------|------------------------|-----------------------|
| Emerging lh pOTS-word<br>(n=24 subjects, n=112<br>sessions) | numbers       | intercept | 1.19                   | -0.04,2.41                   | 110 | 1.92  | 0.06                   |                       |
|                                                             |               | age       | 0.010                  | 0.001,0.018                  | 110 | 2.29  | 0.02                   | 0.07                  |
|                                                             | words         | intercept | -0.09                  | -1.27,1.094                  | 110 | -0.14 | 0.89                   |                       |
|                                                             |               | age       | 0.025                  | 0.017,0.033                  | 110 | 6.17  | 1.15x10 <sup>-8</sup>  | 1.92x10 <sup>-7</sup> |
|                                                             | limbs         | intercept | 3.84                   | 2.59,5.09                    | 110 | 6.09  | 1.67x10 <sup>-8</sup>  |                       |
|                                                             |               | age       | -0.020                 | -0.028,-0.012                | 110 | -4.74 | 6.42x10 <sup>-6</sup>  | 8.03x10 <sup>-5</sup> |
|                                                             | bodies        | intercept | 1.44                   | 0.28,2.60                    | 110 | 2.46  | 0.02                   |                       |
|                                                             |               | age       | -0.015                 | -0.022,-0.007                | 110 | -3.68 | 3.66x10 <sup>-4</sup>  | 0.002                 |
|                                                             | Adult faces   | intercept | -1.25                  | -2.51, 0.02                  | 110 | -1.96 | 0.05                   |                       |
|                                                             |               | age       | -0.007                 | -0.016,0.001                 | 110 | -1.68 | 0.10                   | 0.23                  |
|                                                             | Child faces   | intercept | -1.13                  | -2.69,0.43                   | 110 | -1.44 | 0.15                   |                       |
|                                                             |               | age       | -0.002                 | -0.012,0.009                 | 110 | -0.30 | 0.76                   | 0.83                  |
|                                                             | Cars          | intercept | -0.73                  | -1.90,0.44                   | 110 | -1.23 | 0.22                   |                       |
|                                                             |               | age       | -0.002                 | -0.010,0.006                 | 110 | -0.50 | 0.62                   | 0.77                  |
|                                                             | String instr. | intercept | -0.27                  | -1.30,0.77                   | 110 | -0.51 | 0.61                   |                       |
|                                                             |               | age       | 0.001                  | -0.006,0.008                 | 110 | 0.36  | 0.72                   | 0.81                  |
|                                                             | Houses        | intercept | -0.48                  | -1.72,0.75                   | 110 | -0.78 | 0.44                   |                       |
|                                                             |               | age       | -0.002                 | -0.010,0.007                 | 110 | -0.46 | 0.65                   | 0.77                  |
|                                                             | Corridors     | intercept | -0.91                  | -2.28,0.45                   | 110 | -1.33 | 0.19                   |                       |
|                                                             |               | age       | -0.008                 | -0.017,0.002                 | 110 | -1.66 | 0.10                   | 0.23                  |
| Waning lh OTS-limbs<br>(n=26 subjects, n=122<br>sessions)   | numbers       | intercept | 0.58                   | -0.47,1.63                   | 120 | 1.09  | 0.28                   |                       |
|                                                             |               | age       | -0.002                 | -0.009,0.006                 | 120 | -0.47 | 0.64                   | 0.77                  |
|                                                             | words         | intercept | 0.30                   | -0.97,1.57                   | 120 | 0.47  | 0.64                   |                       |
|                                                             |               | age       | 0.005                  | -0.004,0.014                 | 120 | 1.14  | 0.26                   | 0.44                  |
|                                                             | limbs         | intercept | 7.39                   | 6.09,8.68                    | 120 | 11.30 | 1.31x10 <sup>-20</sup> |                       |
|                                                             |               | age       | -0.030                 | -0.039,-0.021                | 120 | -6.83 | 3.77x10 <sup>-10</sup> | 1.88x10 <sup>-8</sup> |
|                                                             | bodies        | intercept | 3.21                   | 1.97,4.46                    | 120 | 5.12  | 1.18x10 <sup>-6</sup>  |                       |
|                                                             |               | age       | -0.010                 | -0.018,-9.2x10 <sup>-4</sup> | 120 | -2.19 | 0.03                   | 0.09                  |
|                                                             | Adult faces   | intercept | -2.26                  | -3.35,-1.16                  | 120 | -4.09 | 7.85x10 <sup>-5</sup>  |                       |
|                                                             |               | age       | 0.010                  | 0.002,0.017                  | 120 | 2.59  | 0.01                   | 0.04                  |
|                                                             | Child faces   | intercept | -1.08                  | -2.31,0.15                   | 120 | -1.74 | 0.08                   |                       |
|                                                             |               | age       | 0.007                  | -0.002,0.015                 | 120 | 1.62  | 0.11                   | 0.24                  |
|                                                             | Cars          | intercept | -1.19                  | -2.16,-0.23                  | 120 | -2.44 | 0.02                   |                       |
|                                                             |               | age       | -2.71x10 <sup>-4</sup> | -0.007,0.007                 | 120 | -0.08 | 0.94                   | 0.97                  |
|                                                             | String instr. | intercept | -1.05                  | -1.91, -0.19                 | 120 | -2.41 | 0.02                   |                       |
|                                                             |               | age       | 0.004                  | -0.002,0.010                 | 120 | 1.45  | 0.15                   | 0.31                  |
|                                                             | Houses        | intercept | -1.76                  | -2.72,-0.79                  | 120 | -3.61 | 4.47x10 <sup>-4</sup>  |                       |
|                                                             |               | age       | 0.002                  | -0.005,0.008                 | 120 | 0.48  | 0.63                   | 0.77                  |
|                                                             | Corridors     | intercept | -2.90                  | -3.98, -1.82                 | 120 | -5.32 | 4.80x10 <sup>-7</sup>  |                       |
|                                                             |               | age       | 0.002                  | -0.005,0.01                  | 120 | 0.57  | 0.57                   | 0.77                  |
| Emerging lh pFus-faces<br>(n=22 subjects, n=105)            | numbers       | intercept | 0.98                   | -0.23,2.19                   | 103 | 1.61  | 0.11                   |                       |
|                                                             |               | age       | -0.004                 | -0.013,0.004                 | 103 | -1.00 | 0.32                   | 0.51                  |

|                                                             |               |           |                        |                |     |       |                        |                       |
|-------------------------------------------------------------|---------------|-----------|------------------------|----------------|-----|-------|------------------------|-----------------------|
| sessions)                                                   | words         | intercept | 0.43                   | -0.75, 1.61    | 103 | 0.72  | 0.47                   |                       |
|                                                             |               | age       | 0.003                  | -0.005, 0.011  | 103 | 0.79  | 0.43                   | 0.66                  |
|                                                             | limbs         | intercept | 3.30                   | 2.28, 4.32     | 103 | 6.41  | 4.55x10 <sup>-9</sup>  |                       |
|                                                             |               | age       | -0.022                 | -0.028, -0.015 | 103 | -6.24 | 9.79x10 <sup>-9</sup>  | 1.92x10 <sup>-7</sup> |
|                                                             | bodies        | intercept | 1.71                   | 0.60, 2.82     | 103 | 3.04  | 0.003                  |                       |
|                                                             |               | age       | -0.014                 | -0.021, -0.006 | 103 | -3.57 | 5.48x10 <sup>-4</sup>  | 0.002                 |
|                                                             | Adult faces   | intercept | -0.47                  | -1.55, 0.62    | 103 | -0.85 | 0.39                   |                       |
|                                                             |               | age       | 0.016                  | 0.008, 0.023   | 103 | 4.09  | 8.51x10 <sup>-5</sup>  | 4.06x10 <sup>-4</sup> |
|                                                             | Child faces   | intercept | 0.68                   | -0.73, 2.09    | 103 | 0.96  | 0.34                   |                       |
|                                                             |               | age       | 0.020                  | 0.010, 0.030   | 103 | 4.11  | 8.06x10 <sup>-5</sup>  | 4.06x10 <sup>-4</sup> |
|                                                             | Cars          | intercept | -0.86                  | -2.19, 0.47    | 103 | -1.29 | 0.20                   |                       |
|                                                             |               | age       | -2.70x10 <sup>-4</sup> | -0.010, 0.009  | 103 | -0.06 | 0.95                   | 0.97                  |
|                                                             | String instr. | intercept | -0.82                  | -1.87, 0.23    | 103 | -1.55 | 0.13                   |                       |
|                                                             |               | age       | -0.004                 | -0.011, 0.003  | 103 | -1.18 | 0.24                   | 0.43                  |
|                                                             | Houses        | intercept | -1.48                  | -2.50, -0.45   | 103 | -2.86 | 0.005                  |                       |
|                                                             |               | age       | 2.59x10 <sup>-4</sup>  | -0.007, 0.007  | 103 | 0.07  | 0.94                   | 0.97                  |
|                                                             | Corridors     | intercept | -3.05                  | -4.45, -1.66   | 103 | -4.34 | 3.38x10 <sup>-5</sup>  |                       |
|                                                             |               | age       | -0.002                 | -0.011, 0.008  | 103 | -0.35 | 0.73                   | 0.81                  |
| Waning rh OTS-limbs<br>(n=21 subjects, n=100<br>sessions)   | numbers       | intercept | 0.69                   | -0.58, 1.96    | 98  | 1.08  | 0.28                   |                       |
|                                                             |               | age       | -0.005                 | -0.014, 0.003  | 98  | -1.24 | 0.22                   | 0.40                  |
|                                                             | words         | intercept | -0.74                  | -2.04, 0.56    | 98  | -1.13 | 0.26                   |                       |
|                                                             |               | age       | 0.002                  | -0.007, 0.011  | 98  | 0.43  | 0.67                   | 0.78                  |
|                                                             | limbs         | intercept | 5.80                   | 4.41, 7.18     | 98  | 8.31  | 5.51x10 <sup>-13</sup> |                       |
|                                                             |               | age       | -0.020                 | -0.029, -0.010 | 98  | -4.10 | 8.57x10 <sup>-5</sup>  | 4.06x10 <sup>-4</sup> |
|                                                             | bodies        | intercept | 3.22                   | 1.81, 4.63     | 98  | 4.53  | 1.65x10 <sup>-5</sup>  |                       |
|                                                             |               | age       | -0.006                 | -0.016, 0.004  | 98  | -1.24 | 0.22                   | 0.40                  |
|                                                             | Adult faces   | intercept | -2.88                  | -4.45, -1.31   | 98  | -3.64 | 4.43x10 <sup>-4</sup>  |                       |
|                                                             |               | age       | 0.022                  | 0.011, 0.032   | 98  | 4.09  | 8.93x10 <sup>-5</sup>  | 4.06x10 <sup>-4</sup> |
|                                                             | Child faces   | intercept | -1.28                  | -2.98, 0.41    | 98  | -1.50 | 0.14                   |                       |
|                                                             |               | age       | 0.018                  | 0.007, 0.029   | 98  | 3.19  | 0.002                  | 0.007                 |
|                                                             | Cars          | intercept | -0.58                  | -1.67, 0.52    | 98  | -1.04 | 0.30                   |                       |
|                                                             |               | age       | -0.005                 | -0.013, 0.003  | 98  | -1.31 | 0.19                   | 0.39                  |
|                                                             | String instr. | intercept | -0.79                  | -1.71, 0.12    | 98  | -1.72 | 0.09                   |                       |
|                                                             |               | age       | -0.002                 | -0.008, 0.005  | 98  | -0.55 | 0.59                   | 0.77                  |
|                                                             | Houses        | intercept | -1.14                  | -1.89, -0.39   | 98  | -3.02 | 0.003                  |                       |
|                                                             |               | age       | -0.002                 | -0.008, 0.003  | 98  | -0.91 | 0.366                  | 0.57                  |
|                                                             | Corridors     | intercept | -2.69                  | -3.94, -1.43   | 98  | -4.26 | 4.77x10 <sup>-5</sup>  |                       |
|                                                             |               | age       | -1.45x10 <sup>-4</sup> | -0.009, 0.009  | 98  | -0.03 | 0.97                   | 0.97                  |
| Emerging rh pFus-faces<br>(n=21 subjects, n=96<br>sessions) | numbers       | intercept | 0.66                   | -0.53, 1.85    | 94  | 1.10  | 0.28                   |                       |
|                                                             |               | age       | -0.007                 | -0.016, 0.001  | 94  | -1.73 | 0.09                   | 0.23                  |
|                                                             | words         | intercept | -0.20                  | -1.60, 1.20    | 94  | -0.30 | 0.77                   |                       |
|                                                             |               | age       | -0.003                 | -0.013, 0.007  | 94  | -0.63 | 0.53                   | 0.73                  |
|                                                             | limbs         | intercept | 2.75                   | 1.74, 3.76     | 94  | 5.40  | 4.94x10 <sup>-7</sup>  |                       |
|                                                             |               | age       | -0.016                 | -0.023, -0.008 | 94  | -4.31 | 4.02x10 <sup>-5</sup>  | 2.87x10 <sup>-4</sup> |
|                                                             | bodies        | intercept | 1.65                   | 0.30, 2.99     | 94  | 2.43  | 0.02                   |                       |
|                                                             |               | age       | -0.008                 | -0.017, 0.002  | 94  | -1.67 | 0.098                  | 0.23                  |



|               |            |        |                                |    |       |                       |                       |
|---------------|------------|--------|--------------------------------|----|-------|-----------------------|-----------------------|
| Adult faces   | intercept  | -0.81  | -2.08,0.45                     | 94 | -1.29 | 0.20                  |                       |
|               | <i>age</i> | 0.020  | 0.011,0.029                    | 94 | 4.43  | $2.55 \times 10^{-5}$ | $2.12 \times 10^{-4}$ |
| Child faces   | intercept  | 0.71   | -0.63,2.05                     | 94 | 1.06  | 0.30                  |                       |
|               | <i>age</i> | 0.021  | 0.012,0.031                    | 94 | 4.44  | $2.47 \times 10^{-5}$ | $2.12 \times 10^{-4}$ |
| Cars          | intercept  | -0.40  | -1.54,0.74                     | 94 | -0.69 | 0.49                  |                       |
|               | <i>age</i> | -0.003 | -0.011,0.005                   | 94 | -0.72 | 0.47                  | 0.68                  |
| String instr. | intercept  | -1.68  | -2.59,-0.76                    | 94 | -3.63 | $4.69 \times 10^{-4}$ |                       |
|               | <i>age</i> | 0.002  | -0.004,0.009                   | 94 | 0.72  | 0.47                  | 0.68                  |
| Houses        | Intercept  | -0.52  | -1.60,0.57                     | 94 | -0.94 | 0.35                  |                       |
|               | <i>age</i> | -0.004 | -0.012,0.003                   | 94 | -1.12 | 0.27                  | 0.44                  |
| Corridors     | intercept  | -1.51  | -2.87,-0.16                    | 94 | -2.22 | 0.03                  |                       |
|               | <i>age</i> | -0.010 | -0.020,- $3.53 \times 10^{-4}$ | 94 | -2.06 | 0.04                  | 0.12                  |

**Supplementary Table 10.**

Parameters and statistics of LMMs predicting changes in selectivity by age in the developing parts of category-selective ROIs excluding adult faces, child faces, limbs and words from contrasts. Listed by figure order. Related to Fig. 3 and Extended Data Fig. 2

| ROI                                                         | Contrast      | parameter             | $\beta$               | CI                           | df    | t                     | $p$                    | $p_{FDR}$             |
|-------------------------------------------------------------|---------------|-----------------------|-----------------------|------------------------------|-------|-----------------------|------------------------|-----------------------|
| Emerging lh pOTS-word<br>(n=24 subjects, n=112<br>sessions) | numbers       | intercept             | 1.703                 | 0.71,2.70                    | 110   | 3.398                 | $9.47 \times 10^{-4}$  |                       |
|                                                             |               | age                   | 0.006                 | $-7.2 \times 10^{-4}$ ,0.013 | 110   | 1.77                  | 0.079                  | 0.22                  |
|                                                             | words         | intercept             | 0.33                  | -0.73,1.39                   | 110   | 0.61                  | 0.54                   |                       |
|                                                             |               | age                   | 0.0215                | 0.014,0.029                  | 110   | 5.89                  | $4.18 \times 10^{-8}$  | $1.05 \times 10^{-6}$ |
|                                                             | limbs         | intercept             | 3.42                  | 2.19,4.65                    | 110   | 5.53                  | $2.22 \times 10^{-7}$  |                       |
|                                                             |               | age                   | -0.016                | -0.024,-0.008                | 110   | -3.97                 | $1.29 \times 10^{-4}$  | 0.001                 |
|                                                             | bodies        | intercept             | 1.14                  | -0.07,2.35                   | 110   | 1.87                  | 0.06                   |                       |
|                                                             |               | age                   | -0.011                | -0.02,-0.003                 | 110   | -2.76                 | 0.007                  | 0.03                  |
|                                                             | Adult faces   | intercept             | -0.90                 | -2.11,0.31                   | 110   | -1.47                 | 0.14                   |                       |
|                                                             |               | age                   | -0.005                | -0.013,0.003                 | 110   | -1.16                 | 0.25                   | 0.53                  |
|                                                             | Child faces   | intercept             | -0.83                 | -2.32,0.65                   | 110   | -1.11                 | 0.27                   |                       |
|                                                             |               | age                   | $3.73 \times 10^{-4}$ | -0.0095,0.01                 | 110   | 0.075                 | 0.94                   | 0.96                  |
|                                                             | Cars          | intercept             | -0.54                 | -1.73,0.652                  | 110   | -0.898                | 0.37                   |                       |
|                                                             |               | age                   | $-8.2 \times 10^{-4}$ | -0.009,0.007                 | 110   | -0.199                | 0.84                   | 0.96                  |
|                                                             | String instr. | intercept             | -0.25                 | -1.38,0.88                   | 110   | -0.43                 | 0.67                   |                       |
|                                                             |               | age                   | 0.003                 | -0.004,0.011                 | 110   | 0.87                  | 0.39                   | 0.64                  |
|                                                             | Houses        | intercept             | -0.42                 | -1.55,0.71                   | 110   | -0.74                 | 0.46                   |                       |
|                                                             |               | age                   | -0.001                | -0.009,0.006                 | 110   | -0.35                 | 0.73                   | 0.93                  |
| Corridors                                                   | intercept     | -1.14                 | -2.41,0.12            | 110                          | -1.79 | 0.08                  |                        |                       |
|                                                             | age           | -0.005                | -0.013,0.004          | 110                          | -1.10 | 0.27                  | 0.544                  |                       |
| Waning lh OTS-limbs<br>(n=26 subjects, n=122<br>sessions)   | numbers       | intercept             | 1.43                  | 0.44,2.43                    | 120   | 2.85                  | 0.005                  |                       |
|                                                             |               | age                   | -0.004                | -0.01,0.003                  | 120   | -1.18                 | 0.24                   | 0.53                  |
|                                                             | words         | intercept             | 1.13                  | -0.10,2.36                   | 120   | 1.81                  | 0.07                   |                       |
|                                                             |               | age                   | 0.002                 | -0.006,0.011                 | 120   | 0.53                  | 0.60                   | 0.87                  |
|                                                             | limbs         | intercept             | 7.28                  | 5.98,8.58                    | 120   | 11.1                  | $4.06 \times 10^{-20}$ |                       |
|                                                             |               | age                   | -0.028                | -0.037,-0.019                | 120   | -6.30                 | $5.03 \times 10^{-9}$  | $2.51 \times 10^{-7}$ |
|                                                             | bodies        | intercept             | 3.57                  | 2.31,4.84                    | 120   | 5.60                  | $1.41 \times 10^{-7}$  |                       |
|                                                             |               | age                   | -0.01                 | -0.018,-0.001                | 120   | -2.22                 | 0.029                  | 0.095                 |
|                                                             | Adult faces   | intercept             | -1.08                 | -2.11,-0.05                  | 120   | -2.08                 | 0.04                   |                       |
|                                                             |               | age                   | 0.007                 | $-4.4 \times 10^{-4}$ ,0.014 | 120   | 1.86                  | 0.066                  | 0.19                  |
|                                                             | Child faces   | intercept             | -0.089                | -1.27,1.09                   | 120   | -0.15                 | 0.88                   |                       |
|                                                             |               | age                   | 0.004                 | -0.004,0.012                 | 120   | 0.92                  | 0.36                   | 0.62                  |
|                                                             | Cars          | intercept             | -0.38                 | -1.24,0.48                   | 120   | -0.88                 | 0.38                   |                       |
|                                                             |               | age                   | -0.001                | -0.007,0.005                 | 120   | -0.35                 | 0.72                   | 0.93                  |
|                                                             | String instr. | intercept             | -0.27                 | -1.08,0.54                   | 120   | -0.66                 | 0.51                   |                       |
|                                                             |               | age                   | 0.004                 | -0.002,0.01                  | 120   | 1.39                  | 0.17                   | 0.41                  |
|                                                             | Houses        | intercept             | -1.13                 | -1.98,-0.28                  | 120   | -2.64                 | 0.01                   |                       |
|                                                             |               | age                   | $1.56 \times 10^{-4}$ | -0.006,0.006                 | 120   | 0.05                  | 0.96                   | 0.96                  |
| Corridors                                                   | intercept     | -2.23                 | -3.17,-1.30           | 120                          | -4.73 | $6.25 \times 10^{-6}$ |                        |                       |
|                                                             | age           | $7.51 \times 10^{-4}$ | -0.006,0.007          | 120                          | 0.23  | 0.82                  | 0.96                   |                       |
| Emerging lh pFus-faces                                      | numbers       | intercept             | 1.71                  | 0.54,2.88                    | 103   | 2.89                  | 0.005                  |                       |

|                                                       |                                                     |                       |                       |                              |       |                        |                       |                       |
|-------------------------------------------------------|-----------------------------------------------------|-----------------------|-----------------------|------------------------------|-------|------------------------|-----------------------|-----------------------|
| (n=22 subjects, n=105 sessions)                       | words                                               | age                   | -0.003                | -0.01,0.005                  | 103   | -0.66                  | 0.51                  | 0.83                  |
|                                                       |                                                     | intercept             | 1.12                  | -0.06,2.29                   | 103   | 1.89                   | 0.06                  |                       |
|                                                       | limbs                                               | age                   | 0.004                 | -0.004,0.012                 | 103   | 1.06                   | 0.29                  | 0.54                  |
|                                                       |                                                     | intercept             | 3.44                  | 2.37,4.51                    | 103   | 6.38                   | 5.2x10 <sup>-9</sup>  |                       |
|                                                       | bodies                                              | age                   | -0.016                | -0.023,-0.009                | 103   | -4.44                  | 2.29x10 <sup>-5</sup> | 3.82x10 <sup>-4</sup> |
|                                                       |                                                     | intercept             | 2.02                  | 0.89,3.15                    | 103   | 3.54                   | 5.97x10 <sup>-4</sup> |                       |
|                                                       | Adult faces                                         | age                   | -0.007                | -0.015,3.23x10 <sup>-4</sup> | 103   | -1.90                  | 0.06                  | 0.19                  |
|                                                       |                                                     | intercept             | 0.16                  | -0.89,1.21                   | 103   | 0.31                   | 0.76                  |                       |
|                                                       | Child faces                                         | age                   | 0.014                 | 0.007,0.021                  | 103   | 3.78                   | 2.67x10 <sup>-4</sup> | 0.0017                |
|                                                       |                                                     | intercept             | 1.1                   | -0.31,2.5                    | 103   | 1.55                   | 0.12                  |                       |
|                                                       | Cars                                                | age                   | 0.019                 | 0.009,0.028                  | 103   | 3.8                    | 2.45x10 <sup>-4</sup> | 0.0017                |
|                                                       |                                                     | intercept             | 0.002                 | -1.22,1.22                   | 103   | 0.003                  | 0.997                 |                       |
|                                                       | String instr.                                       | age                   | 0.0019                | -0.007,0.01                  | 103   | 0.44                   | 0.66                  | 0.92                  |
|                                                       |                                                     | intercept             | -0.12                 | -1.25,1.01                   | 103   | -0.20                  | 0.84                  |                       |
|                                                       | Houses                                              | age                   | 4.13x10 <sup>-4</sup> | -0.007,0.008                 | 103   | 0.11                   | 0.92                  | 0.96                  |
|                                                       |                                                     | intercept             | -1.196                | -2.26,-0.14                  | 103   | -2.24                  | 0.027                 |                       |
|                                                       | Corridors                                           | age                   | 0.004                 | -0.003,0.011                 | 103   | 1.09                   | 0.28                  | 0.54                  |
|                                                       |                                                     | intercept             | -2.53                 | -3.74,-1.32                  | 103   | -4.14                  | 7.15x10 <sup>-5</sup> |                       |
|                                                       | Waning rh OTS-limbs (n=21 subjects, n=100 sessions) | age                   | 0.0015                | -0.007,0.0099                | 103   | 0.35                   | 0.73                  | 0.93                  |
|                                                       |                                                     | intercept             | 1.31                  | 0.16,2.46                    | 98    | 2.26                   | 0.026                 |                       |
|                                                       | words                                               | age                   | -0.004                | -0.012,0.003                 | 98    | -1.14                  | 0.26                  | 0.53                  |
|                                                       |                                                     | intercept             | -0.11                 | -1.295,1.08                  | 98    | -0.18                  | 0.85                  |                       |
| limbs                                                 | age                                                 | 0.0025                | -0.006,0.01           | 98                           | 0.61  | 0.54                   | 0.85                  |                       |
|                                                       | intercept                                           | 5.19                  | 3.87,6.51             | 98                           | 7.79  | 7.27x10 <sup>-12</sup> |                       |                       |
| bodies                                                | age                                                 | -0.013                | -0.022,-0.004         | 98                           | -2.85 | 0.005                  | 0.026                 |                       |
|                                                       | intercept                                           | 3.21                  | 1.76,4.67             | 98                           | 4.38  | 3.03x10 <sup>-5</sup>  |                       |                       |
| Adult faces                                           | age                                                 | -0.0026               | -0.013,0.007          | 98                           | -0.51 | 0.61                   | 0.87                  |                       |
|                                                       | intercept                                           | -1.95                 | -3.45,-0.45           | 98                           | -2.58 | 0.011                  |                       |                       |
| Child faces                                           | age                                                 | 0.019                 | 0.009,0.029           | 98                           | 3.68  | 3.9x10 <sup>-4</sup>   | 0.002                 |                       |
|                                                       | intercept                                           | -0.52                 | -2.16,1.12            | 98                           | -0.63 | 0.53                   |                       |                       |
| Cars                                                  | age                                                 | 0.015                 | 0.004,0.026           | 98                           | 2.74  | 0.007                  | 0.03                  |                       |
|                                                       | intercept                                           | 0.20                  | -0.79,1.19            | 98                           | 0.40  | 0.69                   |                       |                       |
| String instr.                                         | age                                                 | -0.005                | -0.012,0.002          | 98                           | -1.53 | 0.13                   | 0.34                  |                       |
|                                                       | intercept                                           | -0.24                 | -1.03,0.55            | 98                           | -0.61 | 0.54                   |                       |                       |
| Houses                                                | age                                                 | 1.65x10 <sup>-4</sup> | -0.005,0.006          | 98                           | 0.06  | 0.95                   | 0.96                  |                       |
|                                                       | intercept                                           | -0.95                 | -1.70,-0.20           | 98                           | -2.52 | 0.01                   |                       |                       |
| Corridors                                             | age                                                 | -2.7x10 <sup>-4</sup> | -0.006,0.005          | 98                           | -0.10 | 0.92                   | 0.96                  |                       |
|                                                       | intercept                                           | -2.44                 | -3.58,-1.30           | 98                           | -4.26 | 4.70x10 <sup>-5</sup>  |                       |                       |
| Emerging rh pFus-faces (n=21 subjects, n=96 sessions) | age                                                 | 0.002                 | -0.006,0.01           | 98                           | 0.53  | 0.60                   | 0.87                  |                       |
|                                                       | intercept                                           | 1.11                  | 0.05,2.17             | 94                           | 2.09  | 0.04                   |                       |                       |
| words                                                 | age                                                 | -0.0038               | -0.011,0.004          | 94                           | -1    | 0.32                   | 0.57                  |                       |
|                                                       | intercept                                           | 0.19                  | -1.07,1.45            | 94                           | 0.299 | 0.77                   |                       |                       |
| limbs                                                 | age                                                 | 7.6x10 <sup>-4</sup>  | -0.008,0.01           | 94                           | 0.17  | 0.87                   | 0.96                  |                       |
|                                                       | intercept                                           | 2.7                   | 1.62,3.78             | 94                           | 4.95  | 3.22x10 <sup>-6</sup>  |                       |                       |
| bodies                                                | age                                                 | -0.0095               | -0.017,-0.0018        | 94                           | -2.47 | 0.016                  | 0.055                 |                       |
|                                                       | intercept                                           | 1.54                  | 0.13,2.95             | 94                           | 2.17  | 0.032                  |                       |                       |

|               |            |                       |               |    |       |                       |                       |
|---------------|------------|-----------------------|---------------|----|-------|-----------------------|-----------------------|
|               | <i>age</i> | 3.02x10 <sup>-4</sup> | -0.009,0.01   | 94 | 0.06  | 0.95                  | 0.96                  |
| Adult faces   | intercept  | -0.50                 | -1.79,0.78    | 94 | -0.78 | 0.44                  |                       |
|               | <i>age</i> | 0.0195                | 0.01,0.029    | 94 | 4.21  | 5.75x10 <sup>-5</sup> | 5.75x10 <sup>-4</sup> |
| Child faces   | intercept  | 0.90                  | -0.44,2.23    | 94 | 1.33  | 0.19                  |                       |
|               | <i>age</i> | 0.02                  | 0.011,0.03    | 94 | 4.24  | 5.29x10 <sup>-5</sup> | 5.75x10 <sup>-4</sup> |
| Cars          | intercept  | 0.012                 | -1.08,1.11    | 94 | 0.02  | 0.98                  |                       |
|               | <i>age</i> | 8.91x10 <sup>-4</sup> | -0.007,0.009  | 94 | 0.23  | 0.82                  | 0.96                  |
| String instr. | intercept  | -1.27                 | -2.13,-0.4    | 94 | -2.90 | 0.005                 |                       |
|               | <i>age</i> | 0.008                 | 0.0015,0.0139 | 94 | 2.48  | 0.015                 | 0.055                 |
| Houses        | Intercept  | -0.32                 | -1.36,0.72    | 94 | -0.61 | 0.55                  |                       |
|               | <i>age</i> | -6.3x10 <sup>-4</sup> | -0.008,0.007  | 94 | -0.17 | 0.87                  | 0.96                  |
| Corridors     | intercept  | -1.28                 | -2.53,-0.03   | 94 | -2.03 | 0.045                 |                       |
|               | <i>age</i> | -0.006                | -0.014,0.004  | 94 | -1.21 | 0.23                  | 0.53                  |

**Supplementary Table 11.**

Parameters and statistics of LMMs predicting changes in response values by age in the developing parts of category-selective ROIs. Listed by figure order. Related to Fig. 3 and Extended Data Fig. 2.

| ROI                                                         | Contrast      | parameter             | $\beta$                       | CI                            | df    | t     | p                      | p FDR                 |
|-------------------------------------------------------------|---------------|-----------------------|-------------------------------|-------------------------------|-------|-------|------------------------|-----------------------|
| Emerging lh pOTS-word<br>(n=24 subjects, n=112<br>sessions) | numbers       | intercept             | 0.58                          | 0.04,1.12                     | 110   | 2.13  | 0.04                   |                       |
|                                                             |               | age                   | 0.003                         | -2.9x10 <sup>-4</sup> ,0.007  | 110   | 1.82  | 0.07                   | 0.17                  |
|                                                             | words         | intercept             | 0.17                          | -0.42,0.76                    | 110   | 0.57  | 0.57                   |                       |
|                                                             |               | age                   | 0.008                         | 0.004,0.012                   | 110   | 3.82  | 2.24x10 <sup>-4</sup>  | 0.002                 |
|                                                             | limbs         | intercept             | 0.78                          | 0.30,1.27                     | 110   | 3.19  | 0.002                  |                       |
|                                                             |               | age                   | 3.54x10 <sup>-4</sup>         | -0.003,0.004                  | 110   | 0.22  | 0.82                   | 0.92                  |
|                                                             | bodies        | intercept             | 0.40                          | 0.06,0.74                     | 110   | 2.35  | 0.02                   |                       |
|                                                             |               | age                   | 7.62x10 <sup>-4</sup>         | -0.001,0.003                  | 110   | 0.683 | 0.50                   | 0.64                  |
|                                                             | Adult faces   | intercept             | 0.08                          | -0.21,0.37                    | 110   | 0.55  | 0.58                   |                       |
|                                                             |               | age                   | 0.002                         | -3.4x10 <sup>-4</sup> , 0.004 | 110   | 1.62  | 0.11                   | 0.21                  |
|                                                             | Child faces   | intercept             | 0.03                          | -0.40,0.45                    | 110   | 0.13  | 0.90                   |                       |
|                                                             |               | age                   | 0.003                         | -1.6x10 <sup>-4</sup> , 0.005 | 110   | 1.87  | 0.06                   | 0.16                  |
|                                                             | Cars          | intercept             | 0.08                          | -0.34,0.51                    | 110   | 0.39  | 0.70                   |                       |
|                                                             |               | age                   | 0.003                         | -2.4x10 <sup>-4</sup> , 0.005 | 110   | 1.81  | 0.07                   | 0.17                  |
|                                                             | String instr. | intercept             | 0.11                          | -0.25,0.48                    | 110   | 0.61  | 0.54                   |                       |
|                                                             |               | age                   | 0.004                         | 0.001,0.006                   | 110   | 2.98  | 0.004                  | 0.025                 |
|                                                             | Houses        | intercept             | 0.26                          | -0.26,0.79                    | 110   | 1.00  | 0.32                   |                       |
|                                                             |               | age                   | 0.002                         | -0.002,0.006                  | 110   | 1.12  | 0.27                   | 0.39                  |
| Corridors                                                   | intercept     | 0.27                  | -0.06,0.59                    | 110                           | 1.62  | 0.11  |                        |                       |
|                                                             | age           | 1.18x10 <sup>-4</sup> | -0.002,0.002                  | 110                           | 0.11  | 0.92  | 0.97                   |                       |
| Waning lh OTS-limbs<br>(n=26 subjects, n=122<br>sessions)   | numbers       | intercept             | 0.40                          | 0.10,0.70                     | 120   | 2.61  | 0.01                   |                       |
|                                                             |               | age                   | 1.93x10 <sup>-4</sup>         | -0.002,0.002                  | 120   | 0.19  | 0.85                   | 0.93                  |
|                                                             | words         | intercept             | 0.34                          | -0.02,0.69                    | 120   | 1.86  | 0.06                   |                       |
|                                                             |               | age                   | 0.002                         | -5.9x10 <sup>-4</sup> , 0.004 | 120   | 1.50  | 0.14                   | 0.25                  |
|                                                             | limbs         | intercept             | 1.76                          | 1.40,2.11                     | 120   | 9.74  | 7.04x10 <sup>-17</sup> |                       |
|                                                             |               | age                   | -0.005                        | -0.008,-0.003                 | 120   | -4.47 | 1.81x10 <sup>-5</sup>  | 2.26x10 <sup>-4</sup> |
|                                                             | bodies        | intercept             | 0.62                          | 0.39,0.85                     | 120   | 5.34  | 4.49x10 <sup>-7</sup>  |                       |
|                                                             |               | age                   | -2.99x10 <sup>-5</sup>        | -0.002,0.002                  | 120   | -0.04 | 0.97                   | 0.97                  |
|                                                             | Adult faces   | intercept             | -0.02                         | -0.22,0.18                    | 120   | -0.17 | 0.86                   |                       |
|                                                             |               | age                   | 0.002                         | 4.6x10 <sup>-4</sup> , 0.003  | 120   | 2.64  | 0.01                   | 0.043                 |
|                                                             | Child faces   | intercept             | 0.12                          | -0.19,0.44                    | 120   | 0.77  | 0.45                   |                       |
|                                                             |               | age                   | 0.002                         | -3.4x10 <sup>-4</sup> , 0.004 | 120   | 1.67  | 0.10                   | 0.20                  |
|                                                             | Cars          | intercept             | -0.01                         | -0.29,0.26                    | 120   | -0.09 | 0.93                   |                       |
|                                                             |               | age                   | 0.001                         | -6.4x10 <sup>-4</sup> ,0.003  | 120   | 1.32  | 0.19                   | 0.30                  |
|                                                             | String instr. | intercept             | 0.11                          | -0.09,0.31                    | 120   | 1.06  | 0.29                   |                       |
|                                                             |               | age                   | 0.002                         | 1.2x10 <sup>-4</sup> , 0.003  | 120   | 2.15  | 0.03                   | 0.11                  |
|                                                             | Houses        | intercept             | -0.049                        | -0.31,0.21                    | 120   | -0.37 | 0.71                   |                       |
|                                                             |               | age                   | 0.001                         | -6.4x10 <sup>-4</sup> ,0.003  | 120   | 1.29  | 0.20                   | 0.31                  |
| Corridors                                                   | intercept     | -0.18                 | -0.41,0.04                    | 120                           | -1.61 | 0.11  |                        |                       |
|                                                             | age           | 7.14x10 <sup>-4</sup> | -8.6x10 <sup>-4</sup> , 0.002 | 120                           | 0.90  | 0.37  | 0.51                   |                       |
| Emerging lh pFus-faces                                      | numbers       | intercept             | -0.02                         | -0.61,0.57                    | 103   | -0.07 | 0.95                   |                       |
|                                                             |               | age                   | 0.004                         | 3.8x10 <sup>-4</sup> , 0.009  | 103   | 2.2   | 0.03                   | 0.11                  |

|                                                       |                                                     |           |                        |                               |                             |       |                        |                       |      |
|-------------------------------------------------------|-----------------------------------------------------|-----------|------------------------|-------------------------------|-----------------------------|-------|------------------------|-----------------------|------|
| (n=22 subjects, n=105 sessions)                       | words                                               | intercept | -0.06                  | -0.63,0.51                    | 103                         | -0.21 | 0.83                   |                       |      |
|                                                       |                                                     | age       | 0.006                  | 0.002,0.01                    | 103                         | 2.78  | 0.006                  | 0.04                  |      |
|                                                       | limbs                                               | intercept | 0.49                   | -0.02,0.99                    | 103                         | 1.91  | 0.06                   |                       |      |
|                                                       |                                                     | age       | 0.001                  | -0.003,0.005                  | 103                         | 0.57  | 0.57                   | 0.71                  |      |
|                                                       | bodies                                              | intercept | 0.13                   | -0.25,0.51                    | 103                         | 0.66  | 0.51                   |                       |      |
|                                                       |                                                     | age       | 0.003                  | 3.5x10 <sup>-4</sup> , 0.006  | 103                         | 2.25  | 0.03                   | 0.1                   |      |
|                                                       | Adult faces                                         | intercept | -0.12                  | -0.46,0.22                    | 103                         | -0.69 | 0.49                   |                       |      |
|                                                       |                                                     | age       | 0.006                  | 0.004,0.009                   | 103                         | 5.33  | 5.92x10 <sup>-7</sup>  | 1.48x10 <sup>-5</sup> |      |
|                                                       | Child faces                                         | intercept | -0.30                  | -0.84,0.25                    | 103                         | -1.08 | 0.28                   |                       |      |
|                                                       |                                                     | age       | 0.011                  | 0.007,0.015                   | 103                         | 5.79  | 7.74x10 <sup>-8</sup>  | 3.87x10 <sup>-6</sup> |      |
|                                                       | Cars                                                | intercept | 0.02                   | -0.36,0.40                    | 103                         | 0.11  | 0.91                   |                       |      |
|                                                       |                                                     | age       | 0.003                  | 5.1x10 <sup>-4</sup> , 0.006  | 103                         | 2.36  | 0.02                   | 0.08                  |      |
|                                                       | String instr.                                       | intercept | -0.07                  | -0.42,0.28                    | 103                         | -0.41 | 0.69                   |                       |      |
|                                                       |                                                     | age       | 0.003                  | 7.7x10 <sup>-4</sup> , 0.006  | 103                         | 2.62  | 0.01                   | 0.04                  |      |
|                                                       | Houses                                              | Intercept | -0.29                  | -0.94,0.36                    | 103                         | -0.88 | 0.38                   |                       |      |
|                                                       |                                                     | age       | 0.005                  | -7.3x10 <sup>-5</sup> , 0.009 | 103                         | 1.95  | 0.05                   | 0.15                  |      |
|                                                       | Corridors                                           | intercept | -0.30                  | -0.72,0.11                    | 103                         | -1.46 | 0.15                   |                       |      |
|                                                       |                                                     | age       | 0.003                  | -4.0x10 <sup>-4</sup> , 0.005 | 103                         | 1.71  | 0.09                   | 0.19                  |      |
|                                                       | Waning rh OTS-limbs (n=21 subjects, n=100 sessions) | numbers   | intercept              | 0.78                          | 0.33,1.23                   | 98    | 3.41                   | 9.51x10 <sup>-4</sup> |      |
|                                                       |                                                     |           | age                    | -0.002                        | -0.005,9.8x10 <sup>-4</sup> | 98    | -1.34                  | 0.18                  | 0.30 |
| words                                                 |                                                     | intercept | 0.47                   | 0.04,0.90                     | 98                          | 2.17  | 0.03                   |                       |      |
|                                                       |                                                     | age       | -5.53x10 <sup>-4</sup> | -0.003,0.002                  | 98                          | -0.38 | 0.70                   | 0.84                  |      |
| limbs                                                 |                                                     | intercept | 1.88                   | 1.34,2.42                     | 98                          | 6.90  | 5.13x10 <sup>-10</sup> |                       |      |
|                                                       |                                                     | age       | -0.006                 | -0.009,-0.002                 | 98                          | -2.95 | 0.004                  | 0.025                 |      |
| bodies                                                |                                                     | intercept | 1.01                   | 0.65,1.38                     | 98                          | 5.51  | 2.91x10 <sup>-7</sup>  |                       |      |
|                                                       |                                                     | age       | -0.001                 | -0.004,0.001                  | 98                          | -1.09 | 0.28                   | 0.39                  |      |
| Adult faces                                           |                                                     | intercept | 0.11                   | -0.19,0.41                    | 98                          | 0.72  | 0.47                   |                       |      |
|                                                       |                                                     | age       | 0.003                  | 6.4x10 <sup>-4</sup> ,0.005   | 98                          | 2.62  | 0.01                   | 0.04                  |      |
| Child faces                                           |                                                     | intercept | 0.34                   | -0.12,0.80                    | 98                          | 1.47  | 0.14                   |                       |      |
|                                                       |                                                     | age       | 0.003                  | -2.3x10 <sup>-5</sup> ,0.006  | 98                          | 1.97  | 0.05                   | 0.15                  |      |
| Cars                                                  |                                                     | intercept | 0.32                   | -0.01, 0.65                   | 98                          | 1.90  | 0.06                   |                       |      |
|                                                       |                                                     | age       | -4.05x10 <sup>-4</sup> | -0.003,0.002                  | 98                          | -0.35 | 0.72                   | 0.84                  |      |
| String instr.                                         |                                                     | intercept | 0.43                   | 0.14,0.72                     | 98                          | 2.94  | 0.004                  |                       |      |
|                                                       |                                                     | age       | -8.54x10 <sup>-4</sup> | -0.003,0.001                  | 98                          | -0.86 | 0.39                   | 0.53                  |      |
| Houses                                                |                                                     | Intercept | 0.46                   | 0.08,0.85                     | 98                          | 2.40  | 0.02                   |                       |      |
|                                                       |                                                     | age       | -0.002                 | -0.004,9.6x10 <sup>-4</sup>   | 98                          | -1.26 | 0.21                   | 0.32                  |      |
| Corridors                                             |                                                     | intercept | 0.24                   | -0.05,0.54                    | 98                          | 1.63  | 0.11                   |                       |      |
|                                                       |                                                     | age       | -0.002                 | -0.004,1.3x10 <sup>-4</sup>   | 98                          | -1.86 | 0.07                   | 0.16                  |      |
| Emerging rh pFus-faces (n=21 subjects, n=96 sessions) | numbers                                             | intercept | 0.74                   | 0.26,1.22                     | 94                          | 3.08  | 0.003                  |                       |      |
|                                                       |                                                     | age       | -8.03x10 <sup>-4</sup> | -0.004,0.003                  | 94                          | -0.47 | 0.64                   | 0.78                  |      |
|                                                       | words                                               | intercept | 0.52                   | 0.016,1.03                    | 94                          | 2.05  | 0.04                   |                       |      |
|                                                       |                                                     | age       | 1.18x10 <sup>-4</sup>  | -0.004,0.004                  | 94                          | 0.07  | 0.95                   | 0.97                  |      |
|                                                       | limbs                                               | intercept | 1.18                   | 0.70,1.66                     | 94                          | 4.91  | 3.85x10 <sup>-6</sup>  |                       |      |
|                                                       |                                                     | age       | -0.003                 | -0.006,6.8x10 <sup>-4</sup>   | 94                          | -1.59 | 0.12                   | 0.21                  |      |
|                                                       | bodies                                              | intercept | 0.77                   | 0.34,1.20                     | 94                          | 3.52  | 6.61x10 <sup>-4</sup>  |                       |      |
|                                                       |                                                     | age       | 1.07x10 <sup>-4</sup>  | -0.003,0.003                  | 94                          | 0.07  | 0.94                   | 0.97                  |      |

|               |            |                        |                              |    |       |                       |                       |
|---------------|------------|------------------------|------------------------------|----|-------|-----------------------|-----------------------|
| Adult faces   | intercept  | 0.28                   | -0.09,0.65                   | 94 | 1.48  | 0.14                  |                       |
|               | <i>age</i> | 0.005                  | 0.002,0.008                  | 94 | 3.68  | $3.92 \times 10^{-4}$ | 0.003                 |
| Child faces   | intercept  | 0.45                   | -0.03,0.92                   | 94 | 1.87  | 0.06                  |                       |
|               | <i>age</i> | 0.008                  | 0.005,0.011                  | 94 | 4.75  | $7.42 \times 10^{-6}$ | $1.24 \times 10^{-4}$ |
| Cars          | intercept  | 0.39                   | -0.02,0.80                   | 94 | 1.87  | 0.06                  |                       |
|               | <i>age</i> | 0.001                  | -0.002,0.004                 | 94 | 0.76  | 0.45                  | 0.59                  |
| String instr. | intercept  | 0.19                   | -0.10,0.48                   | 94 | 1.27  | 0.21                  |                       |
|               | <i>age</i> | 0.002                  | $-2.8 \times 10^{-4}$ ,0.004 | 94 | 1.72  | 0.09                  | 0.19                  |
| Houses        | Intercept  | 0.56                   | 0.03,1.10                    | 94 | 2.09  | 0.04                  |                       |
|               | <i>age</i> | $-4.67 \times 10^{-4}$ | -0.004,0.003                 | 94 | -0.24 | 0.81                  | 0.92                  |
| Corridors     | intercept  | 0.45                   | -0.08,1.0                    | 94 | 1.70  | 0.09                  |                       |
|               | <i>age</i> | -0.003                 | -0.006,0.001                 | 94 | -1.39 | 0.17                  | 0.29                  |

**Supplementary Table 12.**

Likelihood ratio tests determining if the selectivity of the dependent variable is better predicted by one or two predictors. Listed by figure order. Related to Fig. 4 and Extended Data Fig. 3.

| ROI                       | No. | Model                            | df | LRStat | <i>p</i>              |
|---------------------------|-----|----------------------------------|----|--------|-----------------------|
| Emerging left pOTS-words  | 1   | Words ~ limbs + (1 subj)         | 4  |        |                       |
|                           | 2   | Words ~ limbs + faces + (1 subj) | 5  | 26.3   | 2.92x10 <sup>-7</sup> |
| Waning left OTS-limbs     | 1   | Limbs ~ faces + (1 subj)         | 4  |        |                       |
|                           | 2   | Limbs ~ faces + words (1 subj)   | 5  | 4.76   | 0.029                 |
| Emerging left pFus-faces  | 1   | Faces ~ limbs + (1 subj)         | 4  |        |                       |
|                           | 2   | Faces ~ limbs + words + (1 subj) | 5  | 6.23   | 0.013                 |
| Waning right OTS-limbs    | 1   | Limbs ~ faces + (1 subj)         | 4  |        |                       |
|                           | 2   | Limbs ~ faces + words (1 subj)   | 5  | 5.03   | 0.025                 |
| Emerging right pFus-faces | 1   | Faces ~ limbs + (1 subj)         | 4  |        |                       |
|                           | 2   | Faces ~ limbs + words + (1 subj) | 5  | 17.45  | 2.95x10 <sup>-5</sup> |



**Supplementary Table 13.**

Parameters and statistics of LMMs testing if selectivity to faces, words and limbs is linked in the developing parts of category-selective ROIs. Listed by figure order. Related to Fig. 4 and Extended Data Fig. 3.

| ROI                                                          | parameter | $\beta$ | CI          | df  | t     | $p$                     |
|--------------------------------------------------------------|-----------|---------|-------------|-----|-------|-------------------------|
| Emerging left pOTS-words<br>(n=24 subjects, n=112 sessions)  | Intercept | 3.18    | 2.80,3.56   | 109 | 16.64 | $1.081 \times 10^{-31}$ |
|                                                              | limbs     | -0.48   | -0.64,-0.31 | 109 | -5.78 | $7.267 \times 10^{-8}$  |
|                                                              | faces     | -0.36   | -0.49,-0.23 | 109 | -5.44 | $3.236 \times 10^{-7}$  |
| Waning left OTS-limbs<br>(n=26 subjects, n=122 sessions)     | Intercept | 3.28    | 2.89,3.68   | 119 | 16.43 | $2.23 \times 10^{-32}$  |
|                                                              | words     | -0.21   | -0.40,-0.02 | 119 | -2.20 | 0.030                   |
|                                                              | faces     | -0.32   | -0.49,-0.15 | 119 | -3.67 | 0.0004                  |
| Emerging left pFus-faces<br>(n=22 subjects, n=105 sessions)  | Intercept | 4.05    | 3.57,4.54   | 102 | 16.57 | $1.066 \times 10^{-30}$ |
|                                                              | words     | -0.33   | -0.58,-0.07 | 102 | -2.54 | 0.013                   |
|                                                              | limbs     | -0.47   | -0.73,-0.21 | 102 | -3.61 | 0.0005                  |
| Waning right OTS-limbs<br>(n=21 subjects, n=100 sessions)    | Intercept | 3.24    | 2.90,3.59   | 97  | 18.77 | $4.59 \times 10^{-34}$  |
|                                                              | words     | -0.24   | -0.46,-0.03 | 97  | -2.28 | 0.025                   |
|                                                              | faces     | -0.32   | -0.45,-0.19 | 97  | -4.80 | $5.74 \times 10^{-6}$   |
| Emerging right pFus-faces<br>(n= 21 subjects, n=96 sessions) | Intercept | 3.81    | 3.27,4.36   | 93  | 13.90 | $1.97 \times 10^{-24}$  |
|                                                              | words     | -0.58   | -0.84,-0.32 | 93  | -4.38 | $3.16 \times 10^{-5}$   |
|                                                              | limbs     | -0.46   | -0.81,-0.12 | 93  | -2.68 | 0.009                   |

**Supplementary Table 14.**

Mean t-values of predictor values and predicted values of dependent variables in the developing parts of category-selective ROIs. Listed by figure order. Related to Fig. 4 and Extended Data Fig. 3.

| ROI and n per group                                   | Predictor variables (PV) | Mean selectivity (t) of PV in 5-9yo, (SD) | Mean selectivity (t) of PV in 13-17yo, (SD) | Dependent variable (DV) | Predicted selectivity (t) of DV for 5-9yo | Predicted selectivity (t) of DV for 13-17yo |
|-------------------------------------------------------|--------------------------|-------------------------------------------|---------------------------------------------|-------------------------|-------------------------------------------|---------------------------------------------|
| Emerging left pOTS-words (5-9yo: n=12; 13-17yo: n=13) | limbs                    | 2.20 (1.28)                               | 0.26 (0.95)                                 | words                   | 2.77                                      | 4.01                                        |
|                                                       | faces                    | -1.76 (1.35)                              | -2.65 (2.11)                                |                         |                                           |                                             |
| Waning left OTS-limbs (5-9yo: n=15; 13-17yo: n=12)    | faces                    | -1.23 (1.52)                              | -0.62 (1.85)                                | limbs                   | 3.54                                      | 3.21                                        |
|                                                       | words                    | 0.63 (1.40)                               | 1.27 (1.22)                                 |                         |                                           |                                             |
| Emerging left pFus-faces (5-9yo: n=13; 13-17yo: n=11) | limbs                    | 1.78 (0.89)                               | -0.82 (0.86)                                | faces                   | 2.91                                      | 4.15                                        |
|                                                       | words                    | 0.95 (1.17)                               | 0.88 (1.29)                                 |                         |                                           |                                             |
| Waning right OTS-limbs (5-9yo: n=12; 13-17yo: n=10)   | faces                    | 0.23 (2.43)                               | 1.18 (3.35)                                 | limbs                   | 3.31                                      | 2.98                                        |
|                                                       | words                    | -0.56 (1.20)                              | -0.47 (1.25)                                |                         |                                           |                                             |
| Emerging right pFus-faces (5-9yo: n=12; 13-17yo: n=8) | limbs                    | 1.50 (0.97)                               | -0.14 (1.13)                                | faces                   | 3.34                                      | 4.13                                        |
|                                                       | words                    | -0.39 (1.54)                              | -0.45 (1.57)                                |                         |                                           |                                             |

**Supplementary Table 15.**

Parameters and statistics of LMMs predicting changes in selectivity by age for different contrasts in developing parts of ROIs. Listed by figure order.

| ROI                                                          | Contrast       | parameter | $\beta$ | CI            | df  | t     | $\rho$                 | $\rho$ FDR             |
|--------------------------------------------------------------|----------------|-----------|---------|---------------|-----|-------|------------------------|------------------------|
| Emerging lh pOTS-word<br>(n=24 subjects, n=112<br>sessions)  | Words vs Faces | Intercept | 0.07    | -1.52,1.65    | 110 | 0.08  | 0.93                   | 0.98                   |
|                                                              |                | age       | 0.026   | 0.016,0.037   | 110 | 4.86  | $3.9 \times 10^{-6}$   | $6.4 \times 10^{-6}$   |
|                                                              | Words vs Limbs | Intercept | -3.44   | -4.79,-2.1    | 110 | -5.06 | $1.7 \times 10^{-6}$   | $3.02 \times 10^{-6}$  |
|                                                              |                | age       | 0.03    | 0.025,0.04    | 110 | 7.5   | $1.8 \times 10^{-11}$  | $1.2 \times 10^{-10}$  |
| Waning lh OTS-limbs<br>(n=26 subjects, n=122<br>sessions)    | Limbs vs Faces | Intercept | 6.47    | 5.15,7.79     | 120 | 9.68  | $9.8 \times 10^{-17}$  | $1.95 \times 10^{-15}$ |
|                                                              |                | age       | -0.027  | -0.036,-0.018 | 120 | -5.92 | $3.13 \times 10^{-8}$  | $8.9 \times 10^{-8}$   |
|                                                              | Limbs vs Words | Intercept | 4.81    | 3.53,6.09     | 120 | 7.45  | $1.56 \times 10^{-11}$ | $1.19 \times 10^{-10}$ |
|                                                              |                | age       | -0.02   | -0.03,-0.015  | 120 | -5.5  | $2.16 \times 10^{-7}$  | $4.3 \times 10^{-7}$   |
| Emerging lh pFus-faces<br>(n=22 subjects, n=105<br>sessions) | Faces vs Limbs | Intercept | -2.56   | -3.74,-1.39   | 103 | -4.33 | $3.5 \times 10^{-5}$   | $5.4 \times 10^{-5}$   |
|                                                              |                | age       | 0.029   | 0.021,0.037   | 103 | 7.19  | $1.08 \times 10^{-10}$ | $4.34 \times 10^{-10}$ |
|                                                              | Faces vs Words | Intercept | -0.01   | -1.35,1.33    | 103 | -0.02 | 0.99                   | 0.99                   |
|                                                              |                | age       | 0.008   | -0.001,0.017  | 103 | 1.74  | 0.08                   | 0.099                  |
| Waning rh OTS-limbs<br>(n=21 subjects, n=100<br>sessions)    | Limbs vs Faces | Intercept | 6.3     | 4.63,7.98     | 98  | 7.46  | $3.6 \times 10^{-11}$  | $1.8 \times 10^{-10}$  |
|                                                              |                | age       | -0.03   | -0.04,-0.02   | 98  | -5.7  | $1.17 \times 10^{-7}$  | $2.59 \times 10^{-7}$  |
|                                                              | Limbs vs Words | Intercept | 4.5     | 3.23,5.76     | 98  | 7.06  | $2.4 \times 10^{-10}$  | $7.9 \times 10^{-10}$  |
|                                                              |                | age       | -0.016  | -0.025,-0.007 | 98  | -3.61 | 0.0005                 | $6.9 \times 10^{-4}$   |
| Emerging rh pFus-faces<br>(n= 21 subjects, n=96<br>sessions) | Faces vs Limbs | Intercept | -1.65   | -2.68,-0.62   | 94  | -3.19 | 0.002                  | 0.0026                 |
|                                                              |                | age       | 0.022   | 0.015,0.029   | 94  | 5.94  | $4.8 \times 10^{-8}$   | $1.19 \times 10^{-7}$  |
|                                                              | Faces vs Words | Intercept | 0.18    | -1.52,1.88    | 94  | 0.21  | 0.83                   | 0.92                   |
|                                                              |                | age       | 0.017   | 0.005,0.029   | 94  | 2.75  | 0.007                  | 0.009                  |
